# Supplementary material
Source: HighWire-hosted journal article supplement (https://cmajopen.ca/highwire/filestream/80959/field_highwire_adjunct_files/1/open-2015-0111-original-submission.pdf)
Supplement: open-2015-0111-original-submission.pdf [file open-2015-0111-original-submission.pdf]

1  
2  
3  
4  
5  
6  
7 **Comparative assessment of the impact of cold and hot temperatures on**  
8 **mortality in Ontario, Canada: population-based study**  
9

10  
11  
12 Hong Chen,<sup>1,2,3</sup> Jun Wang,<sup>1</sup> Qionsi Li,<sup>1</sup> Abderrahmane Yagouti,<sup>4</sup> Eric Lavigne,<sup>5,6</sup> Richard  
13 Foty,<sup>2,7</sup> Richard T Burnett,<sup>8</sup> Paul J Villeneuve,<sup>2,9</sup> Sabit Cakmak,<sup>8</sup> Ray Copes<sup>1,2</sup>  
14

15 <sup>1</sup> Public Health Ontario, Toronto, ON, Canada

16 <sup>2</sup> Dalla Lana School of Public Health, University of Toronto, Toronto, ON, Canada

17 <sup>3</sup> Institute for Clinical Evaluative Sciences, Toronto, ON, Canada

18 <sup>4</sup> Climate Change and Health Office, Health Canada, Ottawa, ON, Canada

19 <sup>5</sup> Air Health Science Division, Health Canada, Ottawa, ON, Canada

20 <sup>6</sup> Department of Epidemiology and Community Medicine, University of Ottawa, ON, Canada

21 <sup>7</sup> Sick Kids Hospital, Toronto, ON, Canada

22 <sup>8</sup> Population Studies Division, Health Canada, Ottawa, ON, Canada

23 <sup>9</sup> Department of Health Sciences, Carleton University, Ottawa, ON, Canada  
24  
25  
26  
27  
28  
29  
30

31 **Correspondence:**

32  
33 Hong Chen, PhD  
34 Public Health Ontario  
35 480 University Avenue, Suite 300  
36 Toronto, Ontario M5G 1V2  
37 Tel: 647-260-7109  
38 Email: [hong.chen@oahpp.ca](mailto:hong.chen@oahpp.ca)  
39  
40  
41  
42  
43  
44  
45  
46  
47  
48  
49  
50  
51  
52  
53  
54  
55  
56  
57  
58  
59  
60

1  
2  
3 **Running Title:** *Chen et al.*; Cold and hot temperatures and mortality  
4

5 **Competing interests:** None declared  
6  
7

8 **Contributors:** All of the authors contributed to the conception and design of the study,  
9  
10 acquisition and interpretation of the data, and drafting and revising of the manuscript. All of the  
11  
12 authors approved the final version submitted for publication.  
13  
14

15 **Acknowledgements:** We thank Mark Goldberg (McGill University, Montreal) for advice and  
16  
17 suggestions in the preparation of this paper.  
18  
19

20 **Funding:** This study was supported by a contract from Health Canada (Contract Number:  
21  
22 4500302837).  
23

24 **Disclaimer:** The opinions, results and conclusions reported in this paper do not necessarily  
25  
26 represent the views of Institute for Clinical Evaluative Sciences or the Ministry of Health and  
27  
28 Long-term Care.  
29  
30  
31  
32  
33  
34  
35  
36  
37  
38  
39  
40  
41  
42  
43  
44  
45  
46  
47  
48  
49  
50  
51  
52  
53  
54  
55  
56  
57  
58  
59  
60

## Abstract

**Background:** Ambient high temperature is associated with mortality; however, heat-related mortality risk has not been quantified systematically in Ontario, the largest province in Canada. Less is known about cold-related risk in this population.

**Methods:** This study comprised all residents of Ontario who died during 1996-2010. A case-crossover analysis was applied to assess the relation between daily temperature fluctuation and deaths from non-accidental and selected causes in cold (December-February) and warm season (June-August), respectively, adjusting for various potential confounders. Risk estimates were obtained for each census division, and then pooled across Ontario. We examined potential effect modification for selected comorbidities and sociodemographic characteristics.

**Results:** In warm season, each 5°C increase in daily mean temperature was associated with a 2.5% increase in non-accidental deaths (95% confidence interval (CI)=1.3%-3.8%) on the day of exposure. In cold season, each 5°C decrease in daily temperature was associated with a 3.0% (95%CI=1.8%-4.2%) increase in non-accidental deaths, which persisted over seven days. The cold-related effects were stronger for cardiovascular-related deaths (any cardiovascular: 4.1%; 95%CI=2.3-5.9% and ischemic heart: 5.8%; 95%CI=3.6%-8.1%), especially among individuals aged <65 years (8.0%; 95%CI=3.0%-13.0%). Conversely, heat most strongly increased respiratory-related deaths during hospitalization (26.0%; 95%CI=0-61.4%). Across Ontario, each 5°C change in daily temperature was estimated to induce 7 excess deaths per day in cold season and 4 excess deaths in warm season.

**Interpretation:** Heat contributed to excess deaths in Ontario, although cold-related impact appeared greater. Further work is required to better define high-risk subgroups, which might include the homeless and individuals with inadequately-heated housing.

## INTRODUCTION

Seasonal variations in mortality have been known for decades. Mortality rate is usually higher in winter than in summer.<sup>1,2</sup> In Ontario, Canada, for example, mortality rates from acute myocardial infarction (AMI) and stroke peaked in January and were lowest in September.<sup>3</sup> The reasons underlying the seasonality of mortality have not been fully understood, although influenza epidemics and accidents and injuries are thought to play an important role.<sup>4-6</sup> More recently, a growing body of evidence from the U.S. and Europe showed that exposure to cold temperatures may contribute to elevated mortality in the winter.<sup>7-9</sup>

Heat, on the other hand, has been associated with mortality worldwide in the summer.<sup>10-14</sup> Despite of rising concern in heat-related effect because of climate change, some studies showed that cold temperatures may have led to greater health impact than heat.<sup>13,15,16</sup> For example, Gasparrini *et al.* found that cold-related mortality accounted for more than one order of magnitude more deaths than heat-related mortality at many locations worldwide, including selected cities in Canada.<sup>13</sup> Similar observations were reported in a U.K. national study.<sup>16</sup> These observations are particularly relevant to Canada, because of cold winters and occasional severe cold spells in various regions of this country.<sup>17</sup> However, the extent to which cold temperatures affect Canadian population has not been well characterized.

Limited data exist about the possible cold effect on mortality in Canada.<sup>13, 18</sup> Among the few Canadian studies on the effect of temperatures, most used broad cause-of-death classification (*e.g.*, non-accidental),<sup>13,18-20</sup> thus provided little information about relationship between temperatures and specific diseases that might be helpful in informing the underlying mechanisms. Furthermore, less is known about who is susceptible to cold and hot temperatures.

1  
2  
3 Given that population's vulnerability and their ability to cope with temperature-induced effects  
4 varies substantially between regions,<sup>21,22</sup> a better understanding of this characteristics can help  
5 protect the vulnerable in winter and summer seasons.  
6  
7  
8  
9

10  
11 We conducted a population-based study to evaluate the extent to which cold and hot  
12 temperatures affect mortality in Ontario, the most populous province in Canada. We aimed to  
13 compare the burden of temperature-related mortality and identify subpopulations highly sensitive  
14 to this effect. A wide range of climates within Ontario and extensive health outcome data  
15 available and its large population makes it an ideal setting to explore the effects of temperatures  
16 on mortality in Canada.  
17  
18  
19  
20  
21  
22  
23  
24

## 25 26 27 **METHODS**

### 28 29 30 **Study Design**

31  
32 We used a case-crossover study design to investigate the acute effects of cold and hot  
33 temperatures on mortality in Ontario. With this design, temperature exposure in the period  
34 preceding each death (case period) was compared to the exposure at a time when death did not  
35 occur (referent period). Because each case serves as its own control, this design effectively  
36 controls for known and unknown confounding factors that do not vary (or vary slowly) over time  
37 such as smoking.<sup>23</sup> This method has commonly been used to study temperature health effects.<sup>22,</sup>  
38  
39  
40  
41  
42  
43  
44  
45  
46  
47  
48  
49  
50  
51  
52  
53  
54  
55  
56  
57  
58  
59  
60  
24-28 Consistent with previous studies,<sup>22,27</sup> we selected referent periods using a time-stratified  
design by matching referent periods (up to four) to case period on the same day of the week  
within the same calendar month.<sup>27</sup> This approach inherently controls for seasonal trends and day-  
of-week effects, thus reducing potential time trend biases.<sup>27</sup>

## Study Population

The study population consisted of all residents of Ontario who died between January 1, 1996 and December 31, 2010 from any non-accidental cause. The study population was assembled using the Registered Persons Database, a registry of all Ontario residents with a health insurance number.<sup>29</sup> Deceased residents were identified through data linkage to the Ontario Registrar General's Death database using residents' unique, encrypted health card number. We ascertained underlying cause of death, date of death, and postal-code residence at time of death. People who died outside Ontario were excluded. We selected *a priori* a total of eight outcomes including non-accidental deaths (International Classification of Diseases [ICD] codes are listed in the Online Appendix) and deaths from five cardiovascular causes (any cardiovascular, coronary heart, acute myocardial infarction [AMI], stroke, and heart failure, cardiac arrest and related), diabetes, and any respiratory cause. To focus on cold and heat effects on mortality, we restricted analysis to deaths occurring in colder months (December-February) (referred to as cold season) and warmer months (June-August) (referred to as warm season).

The Research Ethics Board of the University of Toronto approved the study.

## Temperature Data

Hourly meteorological data on air temperature, relative humidity, dew point temperature, and wind speed were retrieved from Environment Canada for all weather stations in Ontario.<sup>17</sup> For each station, we derived daily average, minimum, and maximum air temperature for both seasons during the study period, and similar metrics for windchill and humidex. Reflecting comfort, windchill and humidex have been widely used to issue extreme cold and heat warnings across Canada.<sup>17</sup> More details are provided in the online appendix.

1  
2  
3  
4 Meteorological data were averaged across all monitoring stations within each census division  
5 (equivalent to counties) to obtain census division-wide mean daily estimates, and then assigned  
6  
7 to study subjects using their residence before death. There are a total of 49 census divisions in  
8  
9 Ontario, broadly classifying into five regions (north, west, east, central east and central west)  
10  
11  
12 (Online appendix).  
13  
14  
15  
16

### 17 **Potential Confounding Factors and Effect Modifiers**

18  
19  
20 Daily mean concentrations of fine particulate matter (particles with aerodynamic diameter  
21  
22  $<2.5\mu\text{m}$  [ $\text{PM}_{2.5}$ ]), nitrogen dioxide ( $\text{NO}_2$ ), and daily 8-hour average ozone ( $\text{O}_3$ ) were obtained for  
23  
24 all air quality monitors in Ontario.<sup>30</sup> Prior to 1998,  $\text{PM}_{2.5}$  was measured on an every-sixth-day  
25  
26 sampling schedule. Similar to meteorological data, we derived census division-wide mean daily  
27  
28 estimates for each pollutant.  
29  
30  
31

32  
33 To account for potential confounding by influenza,<sup>31</sup> we obtained daily number of physician-  
34  
35 office visits due to influenza in each census division (Online appendix).<sup>29</sup> We also created an  
36  
37 indicator variable for statutory holidays.  
38  
39  
40

41  
42 To evaluate whether comorbidities increased individuals' susceptibility to the effects of  
43  
44 temperatures, we *a priori* ascertained the presence of hypertension, AMI, heart failure, diabetes,  
45  
46 or chronic obstructive pulmonary disease (COPD), using validated Ontario registries.<sup>29</sup>  
47  
48

49 Additionally, we determined whether individuals were hospitalized within one year preceding  
50  
51 death for AMI, heart failure, stroke, diabetes, COPD, or respiratory illness, using the Canadian  
52  
53 Institute for Health Information hospital discharge abstracts based on primary and secondary  
54  
55 diagnoses.<sup>22</sup> We classified hospitalizations into three categories (within 28 days, 29 days to one  
56  
57  
58  
59  
60

1  
2  
3 year, and no hospitalization within last year) to distinguish sudden deterioration of health from  
4 chronic conditions. Furthermore, to examine whether individuals living in a healthcare facility  
5 (climate controlled) were susceptible to the impact of ambient temperatures, we determined  
6 place of death (whether or not died in a long-term care facility or a hospital). Among in-hospital  
7 deaths, we further distinguished deaths occurring on the day of admission (day 1) from those  
8 occurring subsequently (day 2+). Lastly, to assess whether temperature effects varied over time,  
9 we created a categorical variable for three time periods (1996-2000, 2001-2005, and 2006-2010).

## 20 21 **Statistical Analysis**

22  
23 Our analysis was carried out in two stages. In the first stage, we modeled the relationship  
24 between daily mortality (non-accidental and cause-specific) and daily mean temperature in each  
25 census division using a conditional logistic regression model, adjusting for relative humidity,  
26 NO<sub>2</sub>, O<sub>3</sub>, influenza, and holidays. Due to considerable missing data for PM<sub>2.5</sub>, we did not include  
27 it in the main model, but considered it in a sensitivity analysis. We chose daily mean air  
28 temperature as our primary exposure because it represents the exposure throughout the entire day  
29 and night.<sup>13</sup> Cold and heat were separately analyzed.

30  
31  
32  
33  
34  
35  
36  
37  
38  
39  
40  
41  
42 Linearity assumption for temperatures was evaluated using restricted cubic spline functions in  
43 the model. Because we found little evidence of non-linearity for the relationship of cold and hot  
44 temperatures with mortality in both seasons, we obtained adjusted odds ratio and associated 95%  
45 confidence interval (95% CI) for every 5°C change in temperatures,<sup>25,26</sup> which were scaled to  
46 represent a mean percent increase in daily mortality per 5°C change (referred to as MPC<sub>5</sub>) for  
47 each census division. Further details on model development and linearity assumption are  
48 provided in the online appendix. In the second stage, we pooled the census division-level  
49  
50  
51  
52  
53  
54  
55  
56  
57  
58  
59  
60



1  
2  
3 estimates to produce a summary estimate using a random-effect meta-analytical technique.<sup>32</sup> We  
4 assessed potential between-census division heterogeneity using Cochran's Q statistic.<sup>33</sup>  
5  
6  
7

8  
9 To understand the influence of lag structures on the temperature-mortality association, we  
10 explored single-day lags of temperature exposure from 0 to 6 days before death and cumulatively  
11 for lags 0-1 (average of the concurrent day and one previous day), 0-3, and 0-6. To control for  
12 potential confounding by air pollution, we fitted air pollutants using lag 0-2 based on evidence  
13 from published Canadian studies.<sup>34-36</sup>  
14  
15  
16  
17  
18  
19

20  
21 We conducted sensitivity analyses by fitting air pollution using lag structures from 0 to 6 days  
22 and modeling other temperature measures (daily minimum and maximum air temperature, and  
23 windchill and humidex). As well, we additionally adjusted for snowfall when assessing cold  
24 effects because of a concern that snow shoveling and/or delay on transit during winters might  
25 increase deaths. We restricted this analysis to five census divisions where snowfall data were  
26 available (Toronto, Ottawa, Hamilton, Essex, and Peel). Furthermore, we additionally controlled  
27 for PM<sub>2.5</sub> in a subcohort with complete data.  
28  
29  
30  
31  
32  
33  
34  
35  
36  
37  
38  
39

40 To identify potentially vulnerable subpopulations, we conducted stratified analyses for each  
41 census division by age, sex, place of death, history of AMI, heart failure, COPD, hypertension,  
42 and diabetes, as well as recent hospitalization for AMI, heart failure, stroke, diabetes, COPD, and  
43 respiratory illness. The effect estimates were then pooled across Ontario.<sup>32</sup> To avoid losing  
44 substantial power, we restricted the analyses to cardiovascular- and respiratory-related deaths,  
45 respectively. We also investigated potential effect modification by different time periods and five  
46 Ontario regions.  
47  
48  
49  
50  
51  
52  
53  
54  
55  
56  
57  
58  
59  
60

## RESULTS

The study population comprised a total of 352,818 individuals who died from any non-accidental cause in Ontario in 1996-2010, after limiting to both seasons and excluding days with missing data on temperature and air pollutants (except for PM<sub>2.5</sub>). A total of 27 census divisions were included in the cohort, covering ~89% of Ontario population (Online appendix). The mean age of cohort at the time of death was 76, about 49% were men, 64% had hypertension, and 33% died from cardiovascular disease and 9% from any respiratory cause (Table 1).

The 27 study census divisions exhibited a wide range of climates, with the median of cold month daily mean temperatures ranging from -11.3°C in Sudbury to -1.2°C in Halton, and warm month temperatures ranging from 15.9°C in Thunder Bay to 21.7°C in Essex (Online appendix).

Among different temperature measures, there were moderate to strong correlations, with Pearson's correlation coefficients ranging from 0.61 to 0.96 (depending on season and census division) (Online appendix). Weaker correlations were observed between temperatures and air pollutants.

In exploratory analysis of the influence of lag structures on the temperature-mortality association, we observed that the effects of cold on mortality (non-accidental and cause-specific) lasted for seven days (lag 0-6) whereas the effects of heat were virtually constrained to same-day exposure (lag 0) (Online appendix). We therefore report here effect estimates for cold at lag 0-6 and heat at lag 0.

On average across the 27 census divisions, there was an increase of 3.0% (95% CI: 1.8-4.2%) in non-accidental mortality with 5°C decrease on cold days (MPC<sub>5</sub>) and 2.5% (95% CI: 1.3-3.8%) with 5°C increase on hot days (Figure 1). Stronger associations for cold temperature were found

1  
2  
3 with death from any cardiovascular cause (MPC<sub>5</sub>=4.1%, 95% CI: 2.3-5.9%), ischemic heart  
4 disease (MPC<sub>5</sub>=5.8%, 95% CI: 3.6-8.1%), and AMI (MPC<sub>5</sub>=5.6%, 95% CI: 2.3-9.1%).  
5  
6

7  
8 Conversely, heat was most strongly linked to respiratory death (MPC<sub>5</sub>=5.4%, 95% CI: 0-11.0%)  
9 and heart failure, cardiac arrest, and related death (MPC<sub>5</sub>=5.1%, 95% CI: -1-10.8%).  
10  
11

12  
13  
14 At the census-division level, there were positive associations between cold and heat with non-  
15 accidental mortality in most of the 27 study census divisions (Figure 2). Similar trends were  
16 observed with other outcomes (Online appendix). At the regional level, the effects of cold and  
17 heat on mortality were generally consistent across the five Ontario regions (Figure 3). Overall,  
18 there was no strong evidence of heterogeneity for temperature-mortality associations across  
19 census divisions (*p-interaction*=0.07 to 0.91, depending on outcomes and seasons).  
20  
21  
22  
23  
24  
25  
26  
27  
28

29 Comparing to the elderly, the impact of cold on cardiovascular deaths appeared stronger for  
30 younger individuals (aged <65: MPC<sub>5</sub>=8.0%; 95%CI=3.0%-13.0% vs. aged ≥65: MPC<sub>5</sub>=3.0%;  
31 95%CI=2.0%-5.0%) (*p-interaction*=0.05) (Figure 4). In contrast, heat was most strongly linked  
32 to respiratory-related deaths occurring during hospitalization (in-hospital: MPC<sub>5</sub>=26.0%;  
33 95%CI=0-61.4% vs. out-of-hospital: MPC<sub>5</sub>=1.4%; 95%CI=-4.7%-7.9%) (*p-interaction*=0.08).  
34  
35  
36  
37  
38  
39  
40

41 We did not find compelling evidence supporting effect modification by selected comorbidities  
42 (*p-interaction*=0.12 to 0.94) (Figure 5). Additionally, there were no clear differences in effect  
43 estimates between time periods.  
44  
45  
46  
47

48  
49 Furthermore, the results did not alter materially after considering other temperature metrics,  
50 further adjusting for snow fall and PM<sub>2.5</sub>, and fitting air pollutants with different lag structures  
51 (Table 2). Of note, mortality was most strongly associated with air temperatures than windchill  
52 and humidex.  
53  
54  
55  
56  
57  
58  
59  
60

## INTERPRETATION

Exposures to ambient cold and hot temperatures significantly increased the risk of mortality in Ontario, with MPC<sub>5</sub> varying from 1.8% to 3.0% for cold and from 1.6% to 2.5% for heat, depending on temperature measures. The associations were robust to sensitivity analyses and appeared stronger for cold temperature and cardiovascular-related deaths, especially ischemic heart disease. Cold effects persisted over seven days whereas heat effects occurred immediately. In addition, heat was most strongly associated with in-hospital deaths while cold appeared to affect mostly younger individuals. Overall, our effect estimates translate to approximately 7 excess deaths per day for each 5°C decrease in daily mean temperature in cold season across the 27 study census divisions, and 4 excess deaths per day for each 5°C increase in warm season, based on census division-specific effect estimates and average daily mortality rates over the course of study (Online appendix).

### Comparison with other studies

The findings of this study are in accordance with previous studies showing that increased mortality in the winter has been independently associated with cold temperatures in many cities in the U.S.<sup>7,15,31</sup> and Europe.<sup>8,11,37-40</sup> Across 15 European cities, each 1°C decrease in temperature was associated with a 1.4% (95% CI: 1.2-1.5%) increase in daily non-accidental deaths and 1.7%, 3.3%, and 1.3% increase in cardiovascular, respiratory, and cerebrovascular deaths, respectively.<sup>8</sup> Similar associations were reported in a study involving 107 U.S. cities.<sup>15</sup>

In this study, there is no clear relation with respiratory-related mortality among Ontario population. However, we found significant cold effects on increasing cardiovascular-related

1  
2  
3 mortality, even after controlling for influenza epidemics and snow fall. Physiologically, exposure  
4 to cold temperatures is capable of increasing cardiac load by initiating inflammatory reactions  
5 and a state of hypercoagulability through elevating fibrinogen and inflammatory markers (*e.g.*,  
6 IL-6) as well as plasma cholesterol and blood viscosity.<sup>9</sup> These factors can promote thrombosis  
7 and clot formation,<sup>9</sup> leading to myocardial ischemia and acute myocardial infarction.<sup>41,42</sup> It is  
8 unclear if the cold effect on mortality in Ontario was partly attributed to the homeless. Our  
9 observations that cold-related mortality more likely affected those < 65 years, and that the cold  
10 effect was similar in individuals with and without chronic conditions, suggest this plausibility.  
11  
12  
13  
14  
15  
16  
17  
18  
19  
20  
21

22  
23 Another important finding is that heat-related mortality risk was highest among hospitalized  
24 individuals. This differs from previous studies conducted in the U.S. and Europe reporting heat-  
25 related mortality was lower during hospitalization than from elsewhere.<sup>22,43,44</sup> Given that heat  
26 increased mortality immediately and that cold-related mortality risk was similar between in  
27 hospitals and outside hospitals in Ontario, it is possible that some hospitals were better able to  
28 provide a protective warm environment in winter than a protective cool environment in summer.  
29  
30  
31  
32  
33  
34  
35  
36  
37

38 Consistent with recent studies,<sup>13,16</sup> we observed that cold temperature posed a greater impact on  
39 mortality than heat in Ontario. Also important is our finding that cold effect lasted over several  
40 days, contrasting with heat effect which was no longer detectable after the day of exposure. This  
41 implies that there is more time to intervene and prevent these deaths than is the case with heat,  
42 which strengthens the argument that cold-related mortality merits additional attention from a  
43 public health perspective. Lastly, weather parameters such as windchill did not result in a better  
44 prediction of mortality compared to air temperature, suggesting that triggers for cold advisories  
45  
46  
47  
48  
49  
50  
51  
52  
53  
54  
55  
56  
57  
58  
59  
60

1  
2  
3 might be better based on temperature alone rather than adding additional variables that reflect  
4  
5 comfort more than risk to health.  
6  
7

### 8 9 **Strengths and weaknesses**

10  
11 One strength of this study is its focus on entire region, instead of selected cities. Ontario  
12  
13 comprises approximately 13.6 million residents (~40% of Canadian population),<sup>45</sup> which allows  
14  
15 us to study the impact of temperature on a large diverse population in Canada. As well, we  
16  
17 obtained extensive information including air pollution, influenza activity, and snowfall, which  
18  
19 allowed for better control for confounding. These variables are known to be associated with  
20  
21 mortality,<sup>31</sup> but are seldom controlled by previous studies in Canada and elsewhere. Aspects of  
22  
23 the case-crossover approach also reduce concerns about confounding. The use of a time-stratified  
24  
25 design in selecting referent periods further reduces time trend biases. Furthermore, our study  
26  
27 benefited from having information on the cause and the place of death and medical history,  
28  
29 allowing for temperature effects to be analyzed in more detail and thus providing important  
30  
31 insight into mechanisms underlying temperature-related mortality in Ontario.  
32  
33  
34  
35  
36  
37  
38

39  
40 Several limitations merit mention. First, we determined temperatures on the basis of regional  
41  
42 estimates from weather stations, which may have led to exposure error because of variability at  
43  
44 individual residences and daily activity patterns. However, previous studies using both  
45  
46 monitoring data and spatial models to predict temperature at residence found similar risk  
47  
48 estimates.<sup>46,47</sup> Nonetheless, given the inherent imprecision of these spatially derived exposures,  
49  
50 our assessment of exposure was likely subject to nondifferential misclassification that would  
51  
52 attenuate our estimates. In addition, the use of death certificates may result in misclassification of  
53  
54  
55  
56  
57  
58  
59  
60

1  
2  
3 death causes which was likely independent of exposure. This may further lead to an  
4  
5 underestimation of the true effect.  
6  
7

8  
9 Second, because we used up to 7-day-moving-average windows of exposure, we were unable to  
10  
11 assess a longer lag structure for cold effects; otherwise some of the control periods would  
12  
13 overlap with our exposure periods. This might have led to an underestimation of the overall cold  
14  
15 effects. However, recent studies showed that cold effects were delayed for two days and lasted  
16  
17 for about a week in selected Canadian cities.<sup>13,19</sup> As a result, we do not expect the inability to  
18  
19 account for longer lag structures to result in a large bias in quantifying cold effects.  
20  
21  
22

23  
24 Third, homeless people are likely among the most vulnerable groups to cold effects. Besides the  
25  
26 homeless, individuals who live in marginal housing where adequate indoor temperatures cannot  
27  
28 be maintained may also be at higher risk for cold-related mortality. However, we were unable to  
29  
30 identify them using administrative databases.  
31  
32  
33

### 34 35 **Conclusions**

36  
37  
38 This study adds weight to previous observations that both cold and heat may significantly  
39  
40 increase mortality and provides new evidence that health impact from cold temperatures appear  
41  
42 greater than that from heat in Ontario. Our findings indicate that greater public health attention to  
43  
44 cold-related mortality is required. Further research to better understand high-risk groups, which  
45  
46 likely include the homeless and individuals with inadequately heated housing, may help target  
47  
48 effective preventive measures.  
49  
50  
51  
52  
53  
54  
55  
56  
57  
58  
59  
60

## Reference

1. Gemmell I, McLoone P, Boddy FA, et al. Seasonal variation in mortality in Scotland. *Int J Epidemiol* 2000;29:274-9.
2. *Mortality: Overview, 2007*. Ottawa (ON): Statistics Canada. <http://www.statcan.gc.ca/pub/91-209-x/2011001/article/11524-eng.htm>. [Accessed April 5, 2015].
3. Sheth T, Nair C, Muller J, et al. Increased winter mortality from acute myocardial infarction and stroke: the effect of age. *J Am Coll Cardiol* 1999;33:1916-9.
4. Warren-Gash C, Smeeth L, Hayward AC. Influenza as a trigger for acute myocardial infarction or death from cardiovascular disease: a systematic review. *Lancet Infect Dis* 2009;9:601-10.
5. Reichert TA, Simonsen L, Sharma A, et al. Influenza and the winter increase in mortality in the United States, 1959-1999. *Am J Epidemiol* 2004;160:492-502.
6. Schanzer DL, Tam TW, Langley JM, et al. Influenza-attributable deaths, Canada 1990-1999. *Epidemiol Infect* 2007;135:1109-16.
7. Curriero FC, Heiner KS, Samet JM, et al. Temperature and mortality in 11 cities of the eastern United States. *Am J Epidemiol* 2002;155:80-7.
8. Analitis A, Katsouyanni K, Biggeri A et al. Effects of cold weather on mortality: results from 15 European cities within the PHEWE project. *Am J Epidemiol* 2008;168:1397-408.
9. Mercer JB. Cold-an underrated risk factor for health. *Environ Res* 2003;92:8-13.
10. Baccini M, Biggeri A, Accetta G et al. Heat effects on mortality in 15 European cities. *Epidemiology* 2008;19:711-9.
11. Huynen MM, Martens P, Schram D, et al. The impact of heat waves and cold spells on mortality rates in the Dutch population. *Environ Health Perspect* 2001;109:463-70.
12. Basu R. High ambient temperature and mortality: a review of epidemiologic studies from 2001 to 2008. *Environ Health* 2009;8:40.
13. Gasparrini A, Guo Y, Hashizume M et al. Mortality risk attributable to high and low ambient temperature: a multicountry observational study. *Lancet* 2015 DOI: [http://dx.doi.org/10.1016/S0140-6736\(14\)62114-0](http://dx.doi.org/10.1016/S0140-6736(14)62114-0).
14. Kosatsky T, Henderson SB, Pollock SL. Shifts in mortality during a hot weather event in Vancouver, British Columbia: rapid assessment with case-only analysis. *Am J Public Health* 2012;102:2367-71.



15. Anderson BG, Bell ML. Weather-related mortality: how heat, cold, and heat waves affect mortality in the United States. *Epidemiology* 2009;20:205-13.
16. Vardoulakis S, Dear K, Hajat S, et al. Comparative assessment of the effects of climate change on heat- and cold-related mortality in the United Kingdom and Australia. *Environ Health Perspect* 2014;122:1285-92.
17. Climate Services, Environment Canada. [http://climate.weather.gc.ca/data\\_index\\_e.html](http://climate.weather.gc.ca/data_index_e.html). [Accessed February 23, 2015].
18. Martin SL, Cakmak S, Hebbern CA, et al. Climate change and future temperature-related mortality in 15 Canadian cities. *Int J Biometeorol* 2012;56:605-19.
19. Goldberg MS, Gasparrini A, Armstrong B, et al. The short-term influence of temperature on daily mortality in the temperate climate of Montreal, Canada. *Environ Res* 2011;111:853-60.
20. Henderson SB, Wan V, Kosatsky T. Differences in heat-related mortality across four ecological regions with diverse urban, rural, and remote populations in British Columbia, Canada. *Health Place* 2013;23:48-53.
21. Zanobetti A, O'Neill MS, Gronlund CJ, et al. Susceptibility to mortality in weather extremes: effect modification by personal and small-area characteristics. *Epidemiology* 2013;24:809-19.
22. Stafoggia M, Forastiere F, Agostini D et al. Vulnerability to heat-related mortality: a multicity, population-based, case-crossover analysis. *Epidemiology* 2006;17:315-23.
23. Maclure M. The case-crossover design: a method for studying transient effects on the risk of acute events. *Am J Epidemiol* 1991;133:144-53.
24. Wilson LA, Morgan GG, Hanigan IC et al. The impact of heat on mortality and morbidity in the Greater Metropolitan Sydney Region: a case crossover analysis. *Environ Health* 2013;12:98.
25. Buckley JP, Richardson DB. Seasonal modification of the association between temperature and adult emergency department visits for asthma: a case-crossover study. *Environ Health* 2012;11:55.
26. Green RS, Basu R, Malig B, et al. The effect of temperature on hospital admissions in nine California counties. *Int J Public Health* 2010;55:113-21.
27. Madrigano J, Mittleman MA, Baccarelli A et al. Temperature, myocardial infarction, and mortality: effect modification by individual- and area-level characteristics. *Epidemiology* 2013;24:439-46.

- 1
  - 2
  - 3
  - 4
  - 5
  - 6
  - 7
  - 8
  - 9
  - 10
  - 11
  - 12
  - 13
  - 14
  - 15
  - 16
  - 17
  - 18
  - 19
  - 20
  - 21
  - 22
  - 23
  - 24
  - 25
  - 26
  - 27
  - 28
  - 29
  - 30
  - 31
  - 32
  - 33
  - 34
  - 35
  - 36
  - 37
  - 38
  - 39
  - 40
  - 41
  - 42
  - 43
  - 44
  - 45
  - 46
  - 47
  - 48
  - 49
  - 50
  - 51
  - 52
  - 53
  - 54
  - 55
  - 56
  - 57
  - 58
  - 59
  - 60
28. Wichmann J, Andersen ZJ, Ketzel M, et al. Apparent temperature and cause-specific mortality in Copenhagen, Denmark: a case-crossover analysis. *Int J Environ Res Public Health* 2011;8:3712-27.
29. Chen H, Burnett RT, Kwong JC et al. Risk of Incident Diabetes in Relation to Long-term Exposure to Fine Particulate Matter in Ontario, Canada. *Environ Health Perspect* 2013;121:804-10.
30. Air Quality Monitoring Network, The Ontario Ministry of the Environment and Climate Change. <http://www.airqualityontario.com/history/locations.php?pol=122>. [Accessed February 23, 2015].
31. von KS, Zanobetti A, Schwartz J. Influenza epidemics, seasonality, and the effects of cold weather on cardiac mortality. *Environ Health* 2012;11:74.
32. DerSimonian R, Laird N. Meta-analysis in clinical trials. *Control Clin Trials* 1986;7:177-88.
33. Pettiti D. *Meta Analysis, Decision Analysis and Cost Effectiveness Analysis*. New York: Oxford University Press; 1999.
34. Burnett RT, Stieb D, Brook JR et al. Associations between short-term changes in nitrogen dioxide and mortality in Canadian cities. *Arch Environ Health* 2004;59:228-36.
35. Goldberg MS, Burnett RT, Stieb DM et al. Associations between ambient air pollution and daily mortality among elderly persons in Montreal, Quebec. *Sci Total Environ* 2013;463-464:931-42.
36. Villeneuve PJ, Chen L, Stieb D, et al. Associations between outdoor air pollution and emergency department visits for stroke in Edmonton, Canada. *Eur J Epidemiol* 2006;21:689-700.
37. Pattenden S, Nikiforov B, Armstrong BG. Mortality and temperature in Sofia and London. *J Epidemiol Community Health* 2003;57:628-33.
38. Hajat S, Bird W, Haines A. Cold weather and GP consultations for respiratory conditions by elderly people in 16 locations in the UK. *Eur J Epidemiol* 2004;19:959-68.
39. Donaldson GC, Keatinge WR. Mortality related to cold weather in elderly people in southeast England, 1979-94. *BMJ* 1997;315:1055-6.
40. Carson C, Hajat S, Armstrong B, et al. Declining vulnerability to temperature-related mortality in London over the 20th century. *Am J Epidemiol* 2006;164:77-84.
41. Barnett AG, Dobson AJ, McElduff P, et al. Cold periods and coronary events: an analysis of populations worldwide. *J Epidemiol Community Health* 2005;59:551-7.

- 1  
2  
3  
4  
5  
6  
7  
8  
9  
10  
11  
12  
13  
14  
15  
16  
17  
18  
19  
20  
21  
22  
23  
24  
25  
26  
27  
28  
29  
30  
31  
32  
33  
34  
35  
36  
37  
38  
39  
40  
41  
42  
43  
44  
45  
46  
47  
48  
49  
50  
51  
52  
53  
54  
55  
56  
57  
58  
59  
60
42. Hong YC, Rha JH, Lee JT, et al. Ischemic stroke associated with decrease in temperature. *Epidemiology* 2003;14:473-8.
  43. O'Neill MS, Zanobetti A, Schwartz J. Modifiers of the temperature and mortality association in seven US cities. *Am J Epidemiol* 2003;157:1074-82.
  44. Stafoggia M, Forastiere F, Agostini D et al. Factors affecting in-hospital heat-related mortality: a multi-city case-crossover analysis. *J Epidemiol Community Health* 2008;62:209-15.
  45. 2006 Census of Canada. Ottawa (ON): Statistics Canada. <http://www12.statcan.ca/census-recensement/2006/rt-td/index-eng.cfm>. [Accessed February 23, 2015].
  46. Guo Y, Barnett AG, Tong S. Spatiotemporal model or time series model for assessing city-wide temperature effects on mortality? *Environ Res* 2013;120:55-62.
  47. O'Neill MS, Zanobetti A, Schwartz J. Disparities by race in heat-related mortality in four US cities: the role of air conditioning prevalence. *J Urban Health* 2005;82:191-7.

## Figure Legends

**Figure 1.** Pooled mean percent change in daily mortality in association with each 5°C decrease in daily mean temperature in cold season (lag 0-6) and each 5°C increase in daily mean temperature in warm season (lag 0), by cause of death, across 27 selected census divisions in Ontario, 1996-2010.

**Figure 2.** Mean percent changes in daily non-accidental mortality in association with each 5°C change in daily mean temperature in cold and warm season, by 27 selected census divisions in Ontario (cold season: lag 0-6; warm season: lag 0).

**Figure 3.** Pooled mean percent changes in daily mortality in association with each 5°C change in daily mean temperature in cold and warm season, by cause of death and region in Ontario, 1996-2010 (cold season: lag 0-6; warm season: lag 0). CVD indicates cardiovascular disease, CHD indicates coronary heart disease, AMI indicates acute myocardial infarction, and CHF indicates congestive heart failure.

**Figure 4.** Subgroup analyses for the associations (A) between each 5°C decrease in daily mean temperature and cardiovascular-related mortality, and (B) between each 5°C increase in daily mean temperature and respiratory-related mortality, stratified by gender, age, long-term care residency, and in-hospital deaths, across 27 selected census divisions in Ontario, 1996-2010 (cold season: lag 0-6; warm season: lag 0).

**Figure 5.** Subgroup analyses for the association between each 5°C decrease in daily mean temperature and cardiovascular-related mortality for (A) age <65 years and (B) age ≥65 years, and for the association between each 5°C increase in daily mean temperature and respiratory-related mortality by (C) age <65 years and (D) age ≥65 years, stratified by selected characteristics, across 27 selected census divisions in Ontario, 1996-2010 (cold season: lag 0-6; warm season: lag 0). AMI indicates acute myocardial infarction, CHF indicates congestive heart failure, COPD indicates chronic obstructive pulmonary disease, and HTN indicates hypertension. NA indicates not available because the number of deaths was too small.

**Table 1.** Characteristics of study cohort in Ontario, 1996 to 2010

| Characteristics                                           | Both seasons <sup>*</sup><br>N=352,818 | Cold season<br>N=188,415 | Warm season<br>N=164,403 |
|-----------------------------------------------------------|----------------------------------------|--------------------------|--------------------------|
| <b><i>Demographic characteristics</i></b>                 |                                        |                          |                          |
| Age, mean (IQR), year                                     | 76 (68-86)                             | 76 (69-86)               | 75 (68-86)               |
| Men                                                       | 49.2                                   | 49.0                     | 49.4                     |
| <b><i>Hospitalizations within 1 year before death</i></b> |                                        |                          |                          |
| Acute myocardial infarction                               | 8.8                                    | 8.9                      | 8.7                      |
| Heart failure                                             | 17.0                                   | 17.1                     | 16.8                     |
| Stroke                                                    | 10.3                                   | 10.3                     | 10.2                     |
| Diabetes                                                  | 16.2                                   | 16.0                     | 16.5                     |
| Chronic obstructive pulmonary disease                     | 11.7                                   | 11.8                     | 11.6                     |
| Any respiratory illness                                   | 32.6                                   | 32.9                     | 32.3                     |
| <b><i>Any history of selected chronic conditions</i></b>  |                                        |                          |                          |
| Hypertension                                              | 63.5                                   | 63.5                     | 63.6                     |
| Acute myocardial infarction                               | 10.7                                   | 10.8                     | 10.6                     |
| Heart failure                                             | 34.5                                   | 34.9                     | 34.1                     |
| Chronic obstructive pulmonary disease                     | 34.8                                   | 34.9                     | 34.8                     |
| Diabetes                                                  | 28.9                                   | 28.7                     | 29.1                     |
| <b><i>Cause of deaths</i></b>                             |                                        |                          |                          |
| Non-accidental                                            | 100                                    | 100                      | 100                      |
| Any cardiovascular                                        | 32.6                                   | 33.2                     | 32.0                     |
| Coronary heart disease                                    | 18.8                                   | 19.1                     | 18.5                     |
| Acute myocardial infarction                               | 8.2                                    | 8.4                      | 7.9                      |
| Heart failure, cardiac arrest and related                 | 4.8                                    | 4.8                      | 4.7                      |
| Stroke                                                    | 7.2                                    | 7.5                      | 6.9                      |
| Diabetes                                                  | 3.6                                    | 3.6                      | 3.6                      |
| Any respiratory cause                                     | 8.8                                    | 9.6                      | 7.9                      |
| <b><i>Time periods</i></b>                                |                                        |                          |                          |
| 1996 - 2000                                               | 27.7                                   | 28.2                     | 27.1                     |
| 2001 - 2005                                               | 31.2                                   | 31.0                     | 31.3                     |
| 2006 - 2010                                               | 41.1                                   | 40.8                     | 41.6                     |
| <b><i>Regions<sup>†</sup></i></b>                         |                                        |                          |                          |
| North                                                     | 3.9                                    | 3.7                      | 4.2                      |
| West                                                      | 10.5                                   | 10.7                     | 10.4                     |
| East                                                      | 9.6                                    | 9.6                      | 9.5                      |
| Central East                                              | 52.3                                   | 52.3                     | 52.3                     |
| Central West                                              | 23.7                                   | 23.7                     | 23.6                     |

Values are percent, unless otherwise specified; IQR: interquartile range

<sup>\*</sup> Cold season: December to February; warm season: June to August.

1  
2  
3  
4  
5  
6  
7  
8  
9  
10  
11  
12  
13  
14  
15  
16  
17  
18  
19  
20  
21  
22  
23  
24  
25  
26  
27  
28  
29  
30  
31  
32  
33  
34  
35  
36  
37  
38  
39  
40  
41  
42  
43  
44  
45  
46  
47  
48  
49  
50  
51  
52  
53  
54  
55  
56  
57  
58  
59  
60

† Five census divisions were included in north region, six in west, three in east, seven in central east and six in central west region.

Confidential

**Table 2.** Sensitivity analyses for the association of non-accidental mortality with every 5°C change in cold and hot temperatures across 27 selected census divisions in Ontario, 1996-2010

| Sensitivity Analysis                                      | Pooled Mean Percent Change in Daily Non-accidental Death (95% CI) * |                            |     |                            |
|-----------------------------------------------------------|---------------------------------------------------------------------|----------------------------|-----|----------------------------|
|                                                           |                                                                     | Cold Season<br>(N=188,415) |     | Warm Season<br>(N=164,403) |
| <i>Modeled different temperature metrics</i>              |                                                                     |                            |     |                            |
| Daily mean air temperature                                | 3.0                                                                 | 1.8 - 4.2                  | 2.5 | 1.3 - 3.8                  |
| Daily maximum air temperature                             | 3.0                                                                 | 1.9 - 4.2                  | 2.2 | 1.0 - 3.4                  |
| Daily minimum air temperature                             | 2.4                                                                 | 1.3 - 3.5                  | 1.8 | 0.6 - 2.9                  |
| Daily mean humidex                                        | - †                                                                 | -                          | 1.6 | 0.8 - 2.3                  |
| Daily maximum humidex                                     | -                                                                   | -                          | 1.5 | 0.7 - 2.3                  |
| Daily mean windchill                                      | 1.8                                                                 | 0.7 - 3.0                  | -   | -                          |
| Daily maximum windchill                                   | 2.3                                                                 | 0.8 - 3.8                  | -   | -                          |
| <i>Modeled different lag structure for air pollutants</i> |                                                                     |                            |     |                            |
| Lag 0                                                     | 3.1                                                                 | 2.1 - 4.2                  | 2.1 | 0.8 - 3.4                  |
| Lag 1                                                     | 2.9                                                                 | 1.8 - 4.1                  | 2.6 | 1.4 - 3.7                  |
| Lag 2                                                     | 2.6                                                                 | 1.4 - 3.7                  | 3.0 | 2.0 - 4.1                  |
| Lag 3                                                     | 2.7                                                                 | 1.6 - 3.8                  | 3.1 | 2.1 - 4.1                  |
| Lag 4                                                     | 2.9                                                                 | 1.8 - 4.0                  | 2.9 | 1.9 - 3.9                  |
| Lag 5                                                     | 2.9                                                                 | 1.6 - 4.3                  | 2.9 | 1.9 - 3.9                  |
| Lag 6                                                     | 2.7                                                                 | 1.3 - 4.0                  | 2.9 | 1.9 - 3.9                  |
| Lag 0-1                                                   | 3.2                                                                 | 2.4 - 4.0                  | 2.1 | 0.9 - 3.4                  |
| Lag 0-2                                                   | 3.0                                                                 | 1.8 - 4.1                  | 2.5 | 1.3 - 3.8                  |
| Lag 0-3                                                   | 3.0                                                                 | 1.8 - 4.2                  | 2.7 | 1.5 - 3.9                  |
| Lag 0-6                                                   | 2.9                                                                 | 1.7 - 4.0                  | 2.9 | 1.8 - 3.9                  |
| <i>Additionally adjusted for Snow fall ‡</i>              |                                                                     |                            |     |                            |
| No                                                        | 3.6                                                                 | 2.0 - 5.2                  | -   | -                          |
| Yes                                                       | 3.6                                                                 | 1.9 - 5.3                  | -   | -                          |
| <i>Additional adjusted for PM<sub>2.5</sub> §</i>         |                                                                     |                            |     |                            |
| No                                                        | 2.7                                                                 | 1.7 - 3.8                  | 2.5 | 1.3 - 3.8                  |
| Yes                                                       | 2.8                                                                 | 1.6 - 3.9                  | 2.6 | 1.2 - 4.1                  |

\* Cold season: daily mean temperature at lag 0-6; warm season: daily mean temperature at lag 0

† Not applicable

‡ Restricted to census divisions with available data on snow fall

§ Restricted to days with available PM<sub>2.5</sub> data (lag 0-2)

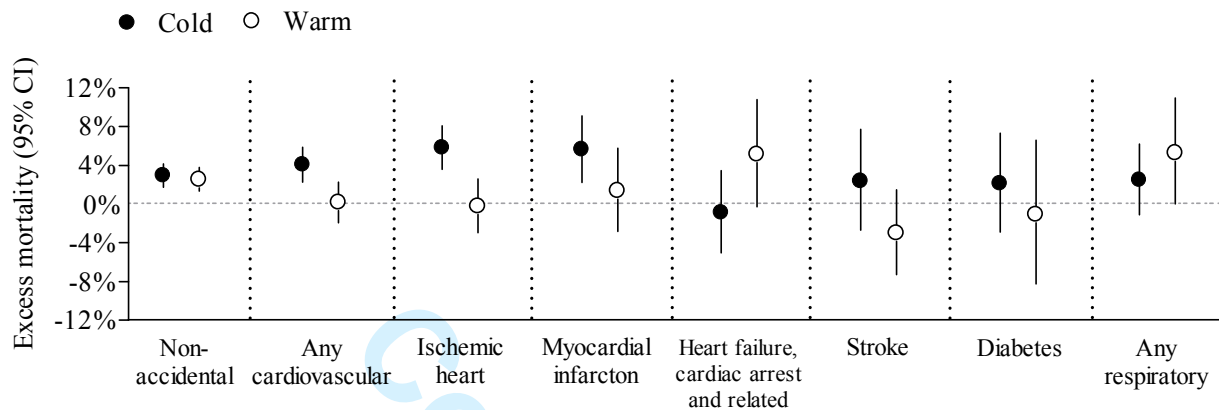

**Figure 1.** Pooled mean percent change in daily mortality in association with each 5°C decrease in daily mean temperature in cold season (lag 0-6) and each 5°C increase in daily mean temperature in warm season (lag 0), by cause of death, across 27 selected census divisions in Ontario, 1996-2010



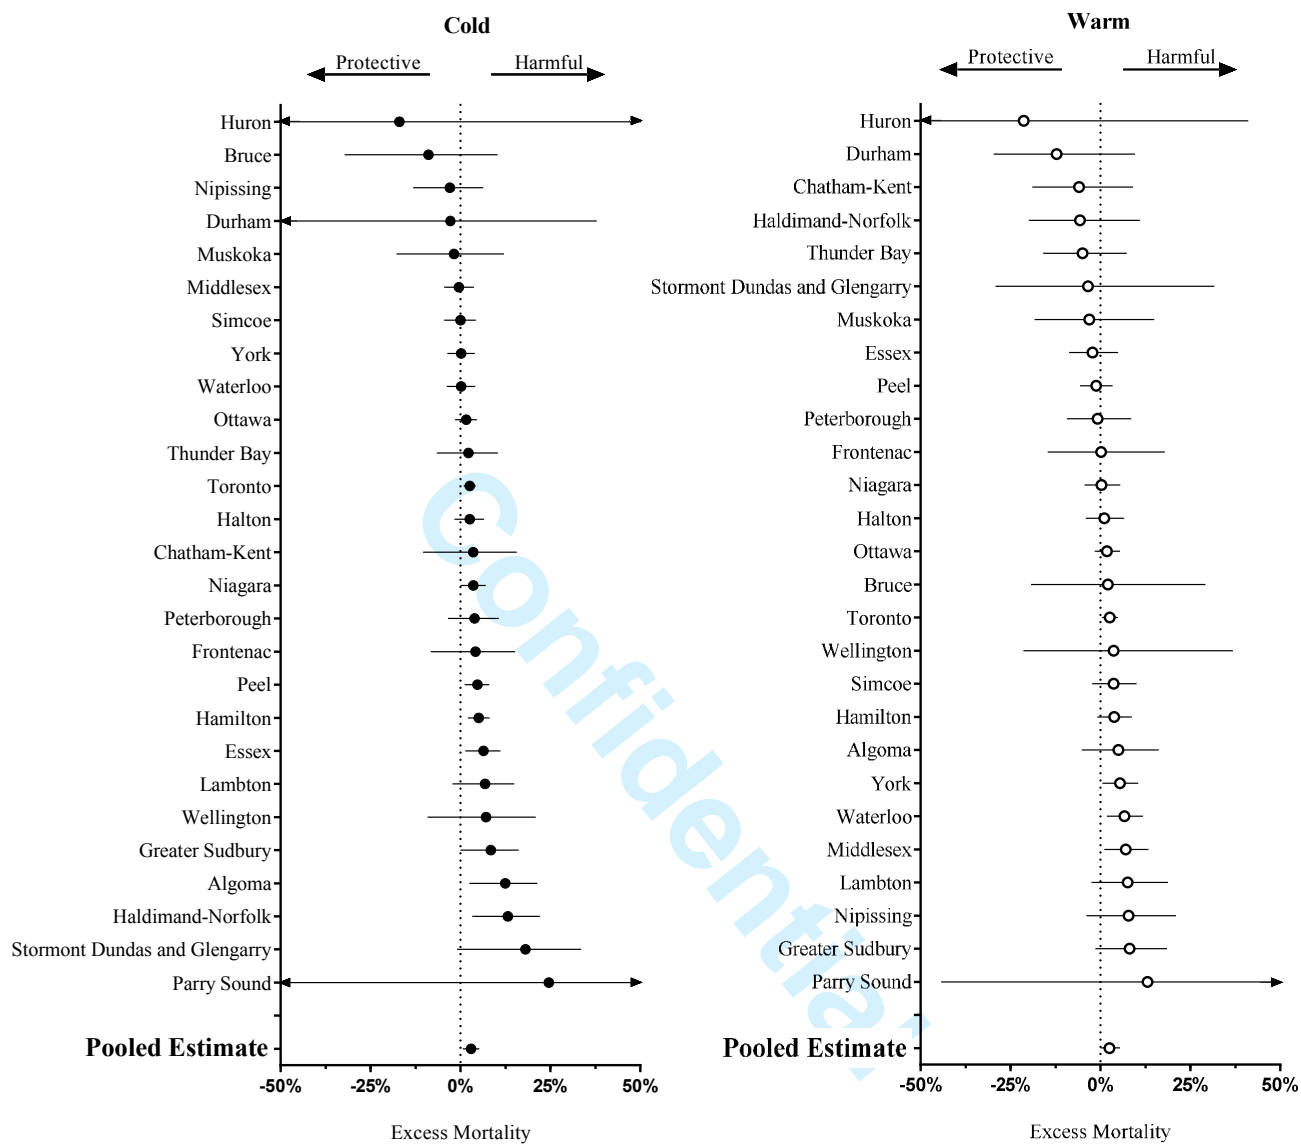

**Figure 2.** Mean percent changes in daily non-accidental mortality in association with each 5°C change in daily mean temperature in cold and warm season, by 27 selected census divisions in Ontario (cold season: lag 0-6; warm season: lag 0)

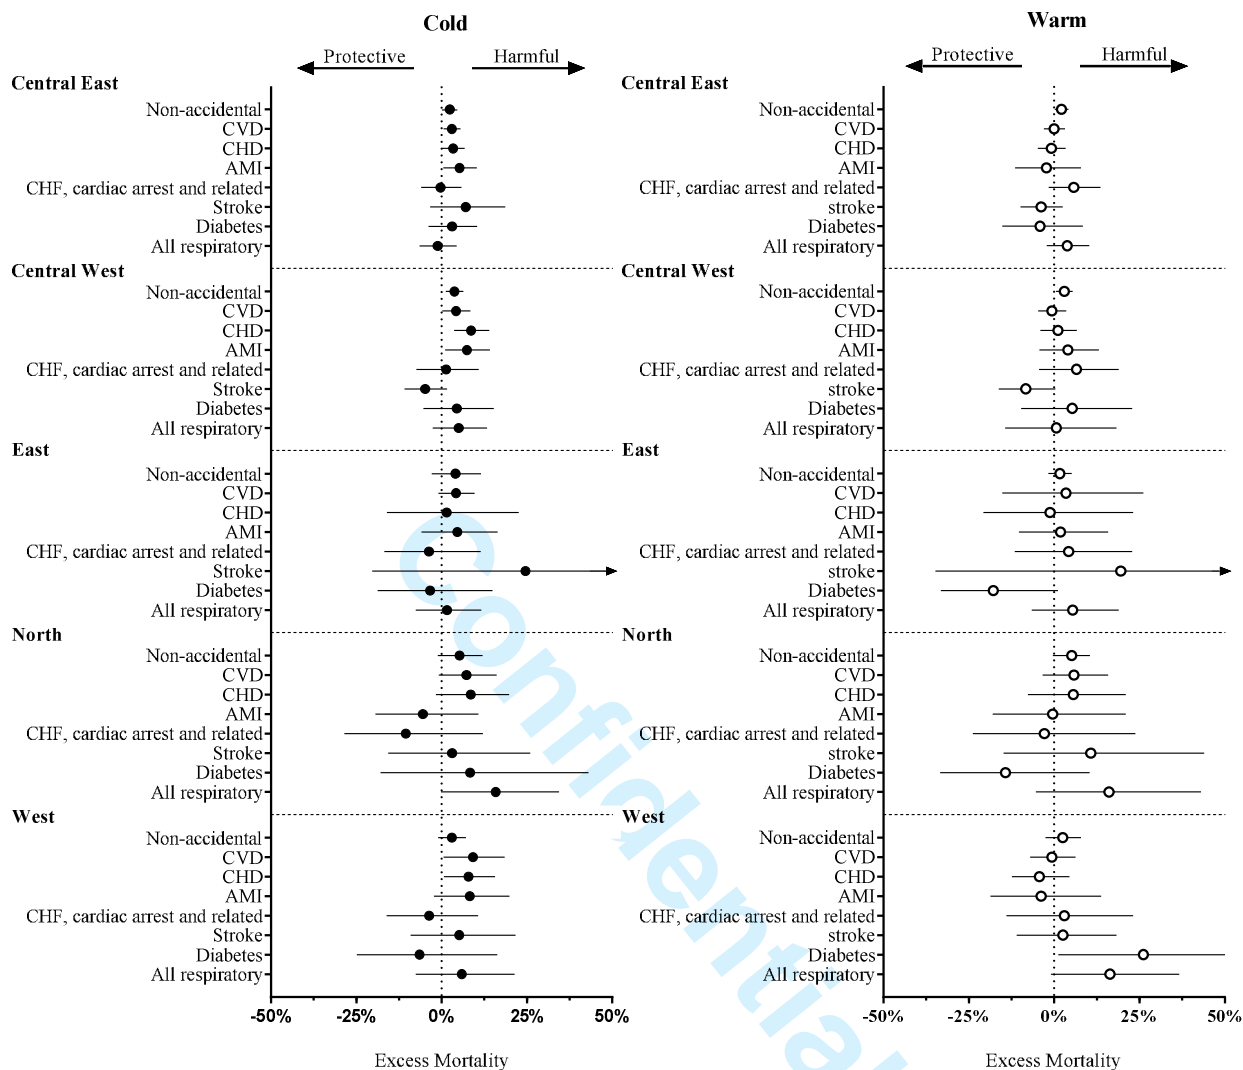

**Figure 3.** Pooled mean percent changes in daily mortality in association with each 5°C change in daily mean temperature in cold and warm season, by cause of death and region in Ontario, 1996-2010 (cold season: lag 0-6; warm season: lag 0). CVD indicates cardiovascular disease, CHD indicates coronary heart disease, AMI indicates acute myocardial infarction, and CHF indicates congestive heart failure.

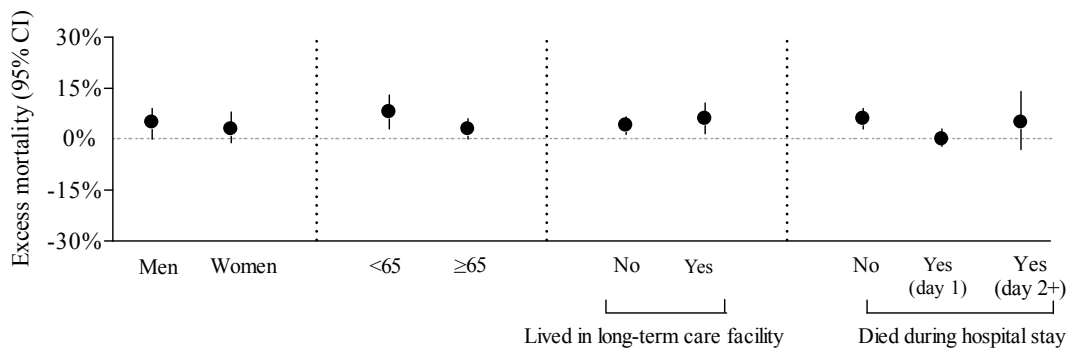

(A) Cold effect on cardiovascular death

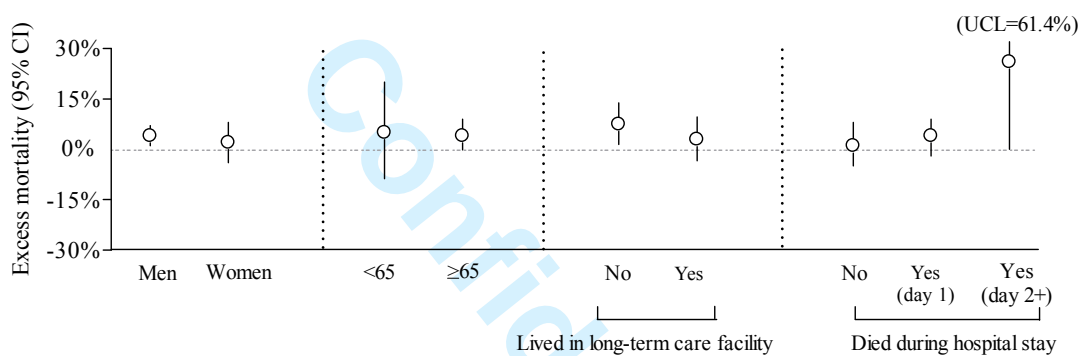

(B) Heat effect on respiratory death

**Figure 4.** Subgroup analyses for the associations (A) between each 5°C decrease in daily mean temperature and cardiovascular-related mortality, and (B) between each 5°C increase in daily mean temperature and respiratory-related mortality, stratified by gender, age, long-term care residency, and in-hospital deaths, across 27 selected census divisions in Ontario, 1996-2010 (cold season: lag 0-6; warm season: lag 0).

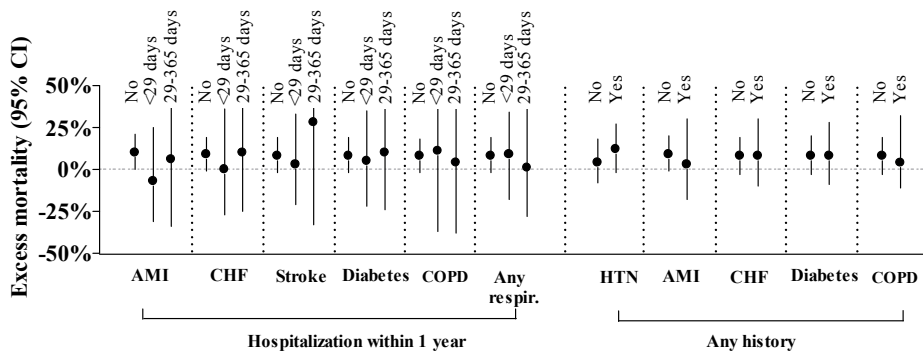

(A) Cold effect on cardiovascular death, age < 65

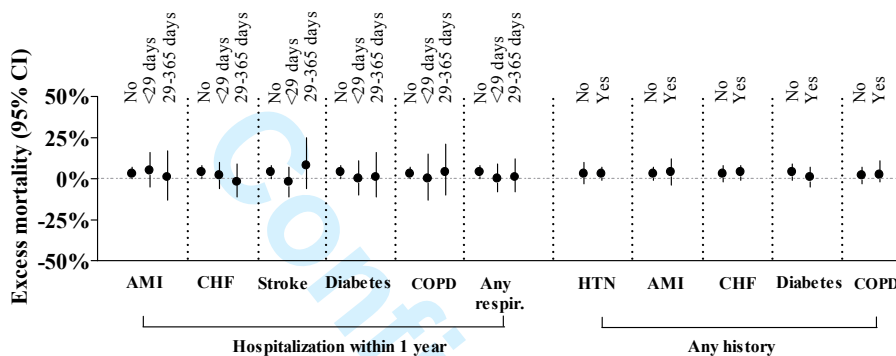

(B) Cold effect on cardiovascular death, age ≥ 65

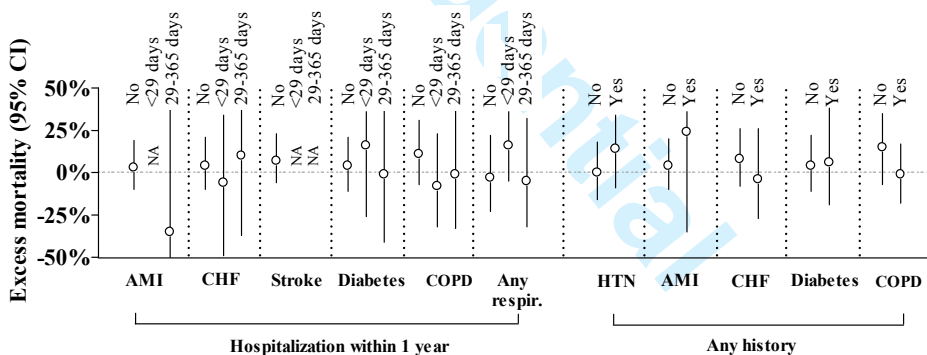

(C) Heat effect on respiratory death, age < 65

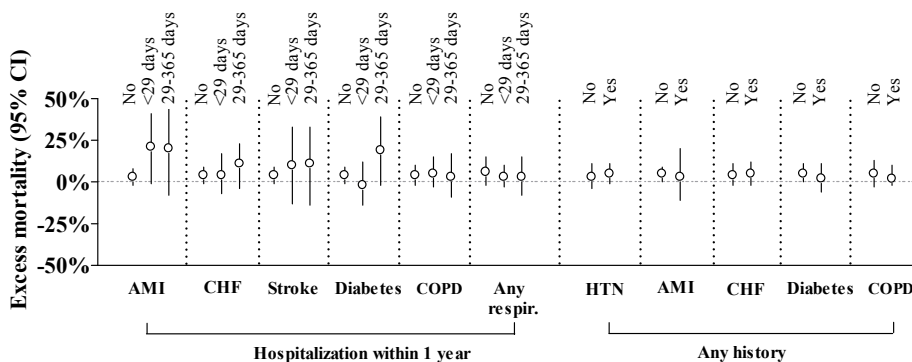

(D) Heat effect on respiratory death, age ≥ 65

1  
2  
3  
4  
5 **Figure 5.** Subgroup analyses for the association between each 5°C decrease in daily mean  
6 temperature and cardiovascular-related mortality for (A) age <65 years and (B) age ≥65 years,  
7 and for the association between each 5°C increase in daily mean temperature and respiratory-  
8 related mortality by (C) age <65 years and (D) age ≥65 years, stratified by selected  
9 characteristics, across 27 selected census divisions in Ontario, 1996-2010 (cold season: lag 0-6;  
10 warm season: lag 0). AMI indicates acute myocardial infarction, CHF indicates congestive heart  
11 failure, COPD indicates chronic obstructive pulmonary disease, and HTN indicates hypertension.  
12 NA indicates not available because the number of deaths was too small.  
13  
14  
15  
16  
17  
18  
19  
20  
21  
22  
23  
24  
25  
26  
27  
28  
29  
30  
31  
32  
33  
34  
35  
36  
37  
38  
39  
40  
41  
42  
43  
44  
45  
46  
47  
48  
49  
50  
51  
52  
53  
54  
55  
56  
57  
58  
59  
60

Confidential

1  
2  
3  
4  
5  
6  
7  
8  
9  
10  
11  
12  
13  
14  
15  
16  
17  
18  
19  
20  
21  
22  
23  
24  
25  
26  
27  
28  
29  
30  
31  
32  
33  
34  
35  
36  
37  
38  
39  
40  
41  
42  
43  
44  
45  
46  
47  
48  
49  
50  
51  
52  
53  
54  
55  
56  
57  
58  
59  
60

## Online Appendix

### Comparative assessment of the impact of cold and hot temperatures on mortality in Ontario, Canada: population-based study

Hong Chen,<sup>1,2,3</sup> Jun Wang,<sup>1</sup> Qiongsi Li,<sup>1</sup> Abderrahmane Yagouti,<sup>4</sup> Eric Lavigne,<sup>5,6</sup> Richard Foty,<sup>2,7</sup> Richard T Burnett,<sup>8</sup> Paul J Villeneuve,<sup>2,9</sup> Sabit Cakmak,<sup>8</sup> Ray Copes<sup>1,2</sup>

<sup>1</sup> Public Health Ontario, Toronto, ON, Canada

<sup>2</sup> Dalla Lana School of Public Health, University of Toronto, Toronto, ON, Canada

<sup>3</sup> Institute for Clinical Evaluative Sciences, Toronto, ON, Canada

<sup>4</sup> Climate Change and Health Office, Health Canada, Ottawa, ON, Canada

<sup>5</sup> Air Health Science Division, Health Canada, Ottawa, ON, Canada

<sup>6</sup> Population Studies Division, Health Canada, Ottawa, ON, Canada

<sup>7</sup> Sick Kids Hospital, Toronto, ON, Canada

<sup>8</sup> Department of Health Sciences, Carleton University, Ottawa, ON, Canada

<sup>9</sup> Climate Change and Health Office, Health Canada, Ottawa, ON, Canada

#### Correspondence:

Hong Chen, PhD  
Public Health Ontario  
480 University Avenue, Suite 300  
Toronto, Ontario M5G 1V2  
Tel: 647-260-7109  
Email: [hong.chen@oahpp.ca](mailto:hong.chen@oahpp.ca)

**Table of Contents**

Expanded Methods .....3  
Figure Legends.....15  
Reference..... 26

Confidential

1  
2  
3  
4  
5  
6  
7  
8  
9  
10  
11  
12  
13  
14  
15  
16  
17  
18  
19  
20  
21  
22  
23  
24  
25  
26  
27  
28  
29  
30  
31  
32  
33  
34  
35  
36  
37  
38  
39  
40  
41  
42  
43  
44  
45  
46  
47  
48  
49  
50  
51  
52  
53  
54  
55  
56  
57  
58  
59  
60

## EXPANDED METHODS

### Mortality Outcomes

Deceased residents were identified using data linkage to the Ontario Registrar General's Death database using the residents' unique, encrypted health card number. We selected *a priori* a total of eight outcomes including non-accidental deaths and deaths from five cardiovascular causes (any cardiovascular, coronary heart, acute myocardial infarction [AMI], stroke, and heart failure, cardiac arrest and related), diabetes, and any respiratory illness. The *International Classification of Diseases, Ninth Revision*, ICD-9 code and *Tenth Revision*, ICD-10 code for our study outcomes are listed in Table S3.

Hospital, laboratory, and physician services in Ontario are funded by the provincial government through a single-payer universal Medicare system that covers virtually all residents.<sup>1</sup>

### Humidex and Windchill

From Environment Canada, we collected hourly weather data including air temperature, relative humidity, dew point temperature and wind speed. We then calculated the daily mean, minimum and maximum of air temperature and relative humidity. We also derived daily average and maximum values of windchill for cold season and humidex for warm season.

Humidex is a popular temperature metric in warm season across Canada, which takes into account temperature and humidity. According to Environment Canada, humidex is equal to air temperature when air temperature is equal to or less than 25°C. When air temperature exceeds 25°C, humidex can be derived using the following formula:<sup>2</sup>

$$\text{Humidex} = (\text{air temperature}) + (0.5555) * (\text{vapour pressure in hPa (mbar)} - 10.0);$$



Where  $e = 6.11 * \exp^{[(5417.7530 * (1/273.16) - (1/dewpoint))]}$ , and  $\exp = 2.7182$ .

Similarly, wind chill is a temperature metric commonly used for cold season across Canada, which takes into account temperature and wind velocity values. Wind chill can be derived using the following formula:<sup>2</sup>

$$\begin{cases} W = 13.12 + 0.6215 * T_{air} - 11.37 * V_{10m}^{0.16} + 0.3965 * T_{air} * V_{10m}^{0.16}, \text{ when } T_{air} \leq 0 \text{ and } 0 < \text{wind speed} < \frac{5km}{h} \\ W = T_{air} + \frac{-1.59 + 0.1345 * T_{air} * V_{10m}}{5}, \text{ when } T_{air} \leq 0 \text{ and } 0 < \text{wind speed} < \frac{5km}{h} \end{cases}$$

Where W is wind chill,  $T_{air}$  is air temperature in °C, and  $V_{10m}$  is wind speed at 10 metres above ground, in kilometres per hour.

### Five Regions in Ontario

We classified 49 census divisions of Ontario into five regions (north, west, east, central east and central west), according to the Ontario health region classification. Table S4 shows census divisions in each region.

### Ascertainment of Influenza Activity

To control for potential confounding by influenza, we obtained daily number of physician-office visits for influenza (diagnostic code 487) for each CD using data from the Ontario Health Insurance Plan Database (OHIP). As the diagnostic code 487 may contain patient visits for influenza vaccination, we excluded the visits with an OHIP fee code that is typically associated with vaccination (G538, G539, G590, G591, Q003, and Q130).

### Further Details of Statistical Analysis

1  
2  
3  
4 Our analysis was carried out in two stages. In the first stage, we modeled the relationship  
5  
6 between daily mortality (non-accidental and cause-specific) and daily mean temperature in each  
7  
8 census division using a conditional logistic regression model, adjusting for daily mean relative  
9  
10 humidity, NO<sub>2</sub>, O<sub>3</sub>, influenza visits, and holidays. Due to considerable missing data for PM<sub>2.5</sub>, we  
11  
12 did not include it in the main model, but considered it in a sensitivity analysis. We chose daily  
13  
14 mean air temperature as our primary exposure because it represents the exposure throughout the  
15  
16 entire day and night, and it has been positively linked to mortality at diverse locations including  
17  
18 several Canadian cities.<sup>3</sup> Cold and heat were separately analyzed.  
19  
20  
21  
22  
23

24 For each census division, we verified the assumption of linearity for the relationship between  
25  
26 temperature and mortality by using restricted cubic spline functions with two, three, and four  
27  
28 degrees of freedom (df), using SAS macro '%LGTPHCURV9'.<sup>4</sup> We examined plots of  
29  
30 temperature-response curves, and conducted likelihood ratio test to determine whether the non-  
31  
32 linear model offered a significant improvement over the linear model. Cold and hot effects were  
33  
34 separately analyzed.  
35  
36  
37  
38  
39

40 As a second test of sensitivity of results to the use of a non-linear model versus linear model, we  
41  
42 implemented a distributed lag non-linear model.<sup>5, 6</sup> Details of the distributed lag non-linear  
43  
44 model have been described elsewhere.<sup>5, 6</sup> Briefly, a distributed lag non-linear model allows for  
45  
46 representing the non-linear relationship of temperature with mortality and the delayed effects of  
47  
48 temperature simultaneously. To do this, a bi-dimensional space of functions is used to describe  
49  
50 the shape of the relationship along both the space of the predictor and the lag dimension of its  
51  
52 occurrence. The relative risk of the outcome ( $Y_i$ ) of daily death counts is estimated using a  
53  
54  
55  
56  
57  
58  
59  
60

1  
2  
3 generalized linear model, with a quasi-Poisson link function to account for over-dispersion. The  
4  
5 model formula is described as follows:  
6  
7

$$\log[E(Y_i)] = \alpha + \sum_{j=1}^p g_j(x_{ij}) + m(t_i)$$

8  
9  
10  
11  
12  
13 Where  $T_i$  represents temperature exposure,  $X_i$  represents covariates, and  $g(\cdot)$  and  $m(\cdot)$  represent  
14  
15 functions.  
16  
17

18  
19  
20 For each census division, we compared the estimated percentage increase in daily mortality for  
21  
22 each 5°C increase in temperature in warm season as estimated by the linear model to the  
23  
24 measurement from the distributed lag non-linear model for a 5°C change in temperature centered  
25  
26 at the census division's 75<sup>th</sup> percentile of temperature in warm season during study period.  
27  
28

29  
30 Similar to previous studies,<sup>7</sup> we selected cubic b-splines to model temperature effect and natural  
31  
32 cubic splines for lag effect. To be consistent with our main analysis, we considered a maximum  
33  
34 lag period of 7 days. We evaluated a range of df for temperature and lag, and we found that the  
35  
36 use of 7 df for temperature and 2 df for lag resulted in the best model fit according to Akaike  
37  
38 information criterion (AIC) and also yielded plausible shape of temperature-response curves  
39  
40 based on the literature.<sup>6, 7</sup> As a result, we chose 7 df for temperature and 2 df for lag. To control  
41  
42 for time trend, we used natural cubic functions for day of week and day of the year. In addition,  
43  
44 we adjusted for humidity, O<sub>3</sub>, NO<sub>2</sub>, influenza activity, and statutory holidays.  
45  
46  
47  
48

49  
50 Because of the relatively small number of deaths in most census divisions, we applied the  
51  
52 sensitivity analysis with a distributed lag non-linear model to the 10 largest census divisions in  
53  
54 Ontario. These include Ottawa, York, Toronto, Peel, Hamilton, Niagara, Waterloo, Essex,  
55  
56 Middlesex, and Simcoe.  
57  
58  
59  
60

1  
2  
3  
4 In the first analysis, we found little evidence that modeling temperature using restricted cubic  
5 splines would improve model fit for cold and hot temperatures. In 26 of the 27 census divisions  
6  
7 in Ontario, using restricted cubic splines did not provide significantly better fit relative to the  
8  
9 models that assumed linearity for cold and hot temperatures ( $p$ -value of likelihood ratio test  
10  
11 ranged from 0.06 to 0.93, depending on census division and season), with the exception of a non-  
12  
13 linear model of heat effect in Toronto ( $p$ -value = 0.03).  
14  
15  
16  
17  
18  
19

20 Because of no evidence of departure from linearity for the cold effects in any census division, we  
21  
22 focused the second analysis on heat effects only. Table S5 shows the effect estimates of hot  
23  
24 temperature from the linear model and estimates from the distributed non-linear model for a 5°C  
25  
26 change in daily mean temperature centered at the census division's 75<sup>th</sup> percentile of  
27  
28 temperatures in warm season. Across the 10 largest census divisions, the effect estimates from  
29  
30 linear models were similar to those derived from non-linear models (Table S5).  
31  
32  
33  
34

35 Overall, there is little evidence of non-linearity for the relationship of temperatures and mortality  
36  
37 in the warm and cold season, respectively. In addition, effect estimates did not alter materially  
38  
39 when using a non-linear model. As a result, we used the linear models to examine the  
40  
41 relationship between cold and hot temperatures and mortality in remaining analyses. We report  
42  
43 adjusted odds ratio and associated 95% confidence interval (95% CI) for every 5°C change in  
44  
45 temperature, which were scaled to represent a mean percent increase in daily mortality per 5°C  
46  
47 change (referred to as MPC<sub>5</sub>), using the following formula:  $(\text{odds ratio} - 1) \times 100\%$ .  
48  
49  
50  
51  
52

53 To identify potentially vulnerable subpopulations, we conducted stratified analyses for each  
54  
55 census division by age, sex, place of death, history of AMI, heart failure, COPD, hypertension,  
56  
57  
58  
59  
60

1  
2  
3 and diabetes, as well as recent hospitalization for AMI, heart failure, stroke, diabetes, COPD, and  
4  
5 respiratory illness. The effect estimates were then pooled across Ontario.<sup>8</sup> To avoid losing  
6  
7 substantial power, we restricted the analyses to cardiovascular- and respiratory-related deaths,  
8  
9 respectively. We also investigated potential effect modification by different time periods (1996-  
10  
11 2000, 2001-2005, and 2006-2010) and regions (north, west, east, central east, and central west).  
12  
13  
14

15  
16 All analyses were conducted using SAS version 9.3 and R statistical software version 3.0.3.  
17  
18

### 19 20 **Further Details of Estimated Burden of Mortality Attributable to Temperature Changes**

21  
22 To quantify the burden of death attributed to short-term exposure to cold and hot temperatures,  
23  
24 we derived attributable fraction which was applied to the observed mean daily non-accidental  
25  
26 deaths for each census division during the period 1996 to 2010 using the formula as follows:<sup>9, 10</sup>  
27  
28  
29

$$30 \quad AF_i = (OR_i - 1) / OR_i \quad (1)$$

$$31 \quad \text{Estimated excess deaths} = \sum(AF_i * \text{mean daily death counts } i) \quad (2)$$

32  
33 Where  $AF_i$  is the attributable fraction (*i.e.*, burden attributable to risk factor such as 5°C decrease  
34  
35 in daily mean temperature in cold season) for census division  $i$ ,  $OR_i$  is the adjusted odds ratio  
36  
37 corresponding to each 5°C change in daily mean temperature for census division  $i$ .  
38  
39  
40  
41  
42  
43  
44  
45  
46  
47  
48  
49  
50  
51  
52  
53  
54  
55  
56  
57  
58  
59  
60

**Supplemental Table S1.** Distribution of selected air temperature variables in Ontario, by census division, 1996-2010**A. Cold Season**

| Census Division | Daily Mean<br>Ambient Temperature |        |      |      | Daily Min<br>Ambient Temperature |        |      |     | Daily Max<br>Ambient Temperature |        |      |     |
|-----------------|-----------------------------------|--------|------|------|----------------------------------|--------|------|-----|----------------------------------|--------|------|-----|
|                 | Min                               | Median | Max  | Std* | Min                              | Median | Max  | Std | Min                              | Median | Max  | Std |
| Algoma          | -27.9                             | -8.4   | 7.8  | 6.7  | -36.3                            | -12.7  | 5.0  | 8.0 | -23.1                            | -4.7   | 10.5 | 5.8 |
| Bruce           | -22.0                             | -3.6   | 9.9  | 5.3  | -28.6                            | -6.8   | 8.0  | 6.1 | -18.8                            | -0.7   | 12.4 | 4.9 |
| Chatham-Kent    | -18.6                             | -1.6   | 12.2 | 5.0  | -23.0                            | -4.3   | 10.3 | 5.9 | -15.7                            | 0.7    | 13.9 | 4.7 |
| Essex           | -20.4                             | -1.6   | 15.6 | 5.2  | -24.0                            | -4.1   | 12.4 | 5.6 | -17.2                            | 0.8    | 20.4 | 5.2 |
| Frontenac       | -24.4                             | -3.3   | 10.6 | 6.2  | -30.7                            | -7.5   | 9.4  | 7.3 | -22.3                            | -0.4   | 15.0 | 5.9 |
| Haldimand-      |                                   |        |      |      |                                  |        |      |     |                                  |        |      |     |
| Norfolk         | -20.7                             | -2.0   | 14.8 | 5.4  | -29.3                            | -5.0   | 11.3 | 6.1 | -16.0                            | 0.6    | 18.7 | 5.5 |
| Halton          | -17.9                             | -1.2   | 15.1 | 5.2  | -21.2                            | -4.0   | 11.4 | 5.6 | -15.0                            | 1.4    | 19.1 | 5.2 |
| Hamilton        | -19.7                             | -2.5   | 15.9 | 5.6  | -26.8                            | -5.9   | 11.9 | 6.3 | -16.8                            | 0.4    | 18.4 | 5.5 |
| Huron           | -19.3                             | -2.5   | 13.8 | 5.1  | -23.9                            | -5.4   | 10.7 | 5.8 | -16.4                            | -0.1   | 18.3 | 5.1 |
| Lambton         | -19.3                             | -2.2   | 16   | 5.4  | -24.1                            | -4.8   | 13.2 | 6.0 | -16.7                            | 0      | 19.2 | 5.4 |
| Middlesex       | -19.8                             | -3.2   | 14.5 | 5.5  | -26.5                            | -6.4   | 11.1 | 6.3 | -16.8                            | -0.3   | 17.5 | 5.6 |
| Muskoka         | -27.1                             | -6.0   | 10.6 | 6.6  | -36.0                            | -10.9  | 8.4  | 8.4 | -22.0                            | -2.0   | 15.0 | 5.8 |
| Niagara         | -15.7                             | -1.3   | 15.3 | 5.1  | -19.9                            | -4.2   | 10.7 | 5.4 | -13.2                            | 1.1    | 19.6 | 5.2 |
| Nipissing       | -30.8                             | -9.0   | 8.7  | 7.0  | -37.6                            | -14.5  | 6.5  | 8.2 | -26.4                            | -4.3   | 12.6 | 6.5 |
| Ottawa          | -26.9                             | -6.9   | 10.7 | 6.5  | -30.2                            | -11.3  | 6.2  | 7.1 | -24.8                            | -3.0   | 17.1 | 6.4 |
| Parry Sound     | -30.2                             | -5.8   | 9.0  | 7.0  | -48.8                            | -11.3  | 8.3  | 9.0 | -21.9                            | -1.5   | 13.7 | 6.0 |
| Peel            | -20.5                             | -2.7   | 13.4 | 5.6  | -24.4                            | -6.1   | 11.4 | 6.1 | -16.6                            | 0.4    | 18.0 | 5.5 |
| Peterborough    | -24.6                             | -4.9   | 11.3 | 6.3  | -34.0                            | -9.7   | 8.2  | 7.7 | -21.0                            | -0.7   | 16.8 | 5.8 |
| Simcoe          | -24.2                             | -4.3   | 12.4 | 6.0  | -31.6                            | -8.2   | 9.7  | 7.1 | -20.1                            | -0.8   | 15.9 | 5.5 |
| Stormont        |                                   |        |      |      |                                  |        |      |     |                                  |        |      |     |
| Dundas and      |                                   |        |      |      |                                  |        |      |     |                                  |        |      |     |
| Glengarry       | -26.7                             | -7.7   | 8.5  | 7.0  | -31.1                            | -13.0  | 6.6  | 8.0 | -24.2                            | -3.1   | 14.6 | 6.8 |
| Sudbury         | -31.9                             | -11.3  | 5.9  | 7.4  | -44.0                            | -16.2  | 4.1  | 9.4 | -26.5                            | -7.2   | 9.6  | 6.7 |
| Thunder Bay     | -31.5                             | -11.3  | 4.8  | 7.1  | -38.3                            | -16.5  | 2.5  | 8.1 | -27.5                            | -6.4   | 7.8  | 6.4 |
| Toronto         | -19.3                             | -1.4   | 10.1 | 5.1  | -23.3                            | -4.2   | 8.2  | 5.7 | -15.8                            | 1.4    | 14.7 | 4.8 |
| Waterloo        | -22.3                             | -3.8   | 13.5 | 5.7  | -29.7                            | -6.9   | 10.9 | 6.7 | -16.9                            | -1.0   | 17.0 | 5.5 |
| Wellington      | -22.8                             | -4.7   | 12.6 | 5.7  | -30.3                            | -8.5   | 8.8  | 6.8 | -18.3                            | -1.8   | 15.7 | 5.5 |
| York            | -21.9                             | -3.4   | 12.6 | 5.7  | -26.7                            | -7.4   | 10.3 | 6.5 | -18.2                            | -0.1   | 17.8 | 5.5 |

\* Standard deviation

## B. Warm Season

| Census Division | Daily Mean Ambient Temperature |        |      |      | Daily Min Ambient Temperature |        |      |     | Daily Max Ambient Temperature |        |      |     |
|-----------------|--------------------------------|--------|------|------|-------------------------------|--------|------|-----|-------------------------------|--------|------|-----|
|                 | Min                            | Median | Max  | Std* | Min                           | Median | Max  | Std | Min                           | Median | Max  | Std |
| Algoma          | 6.4                            | 17.4   | 26.5 | 3.2  | 1.1                           | 11.9   | 20.7 | 3.5 | 8.6                           | 21.7   | 31.5 | 3.6 |
| Bruce           | 7.5                            | 17.7   | 24.9 | 3.3  | 2.7                           | 13.9   | 22.5 | 3.7 | 8.4                           | 21.3   | 30.5 | 3.7 |
| Chatham-Kent    | 9.7                            | 20.8   | 30.1 | 3.1  | 4.2                           | 17.2   | 25.7 | 3.6 | 12.0                          | 24.1   | 35.5 | 3.3 |
| Essex           | 10.8                           | 21.7   | 30.5 | 3.2  | 4.7                           | 17.8   | 27.0 | 3.4 | 12.4                          | 25.7   | 34.8 | 3.6 |
| Frontenac       | 9.7                            | 20.7   | 29.9 | 3.0  | 4.4                           | 16.1   | 25.7 | 3.7 | 12.1                          | 23.8   | 34.6 | 3.3 |
| Haldimand-      |                                |        |      |      |                               |        |      |     |                               |        |      |     |
| Norfolk         | 10.0                           | 20.5   | 28.2 | 3.1  | 4.4                           | 16.4   | 25.2 | 3.5 | 12.5                          | 24.6   | 34.4 | 3.4 |
| Halton          | 8.9                            | 20.9   | 31.1 | 3.6  | 7.0                           | 17.6   | 28.0 | 3.4 | 10.7                          | 24.2   | 35.8 | 4.4 |
| Hamilton        | 9.9                            | 20.5   | 30.1 | 3.4  | 2.0                           | 15.1   | 25.6 | 3.6 | 11.3                          | 25.5   | 36.6 | 4.0 |
| Huron           | 7.2                            | 19.2   | 28.0 | 3.5  | 2.3                           | 14.3   | 25.5 | 4.0 | 10.7                          | 23.3   | 34.0 | 4.0 |
| Lambton         | 9.1                            | 20.7   | 30.7 | 3.6  | 3.3                           | 16.1   | 26.3 | 3.8 | 11.3                          | 24.8   | 36.7 | 4.4 |
| Middlesex       | 9.7                            | 20.2   | 30.7 | 3.3  | 2.8                           | 14.9   | 26.1 | 3.7 | 12.9                          | 25.4   | 36.5 | 3.7 |
| Muskoka         | 7.6                            | 18.9   | 28.8 | 3.3  | -0.3                          | 12.8   | 24.1 | 3.8 | 11.4                          | 23.95  | 33.5 | 3.9 |
| Niagara         | 10.8                           | 21.2   | 30.7 | 3.2  | 7.4                           | 17.2   | 26.8 | 3.3 | 12.9                          | 24.7   | 34.8 | 3.6 |
| Nipissing       | 5.0                            | 17.9   | 26.9 | 3.4  | 0.8                           | 12.8   | 22.2 | 3.7 | 8.5                           | 23.1   | 34.7 | 4.0 |
| Ottawa          | 8.5                            | 20.1   | 29.7 | 3.3  | 3.8                           | 15.1   | 23.9 | 3.3 | 12.3                          | 25.1   | 36.6 | 4.0 |
| Parry Sound     | 7.5                            | 18.9   | 28.5 | 3.3  | -0.8                          | 13.9   | 26.6 | 4.2 | 12.2                          | 23.9   | 33.8 | 3.6 |
| Peel            | 9.6                            | 21.1   | 31.7 | 3.5  | 3.7                           | 16.3   | 26.7 | 3.6 | 13.6                          | 25.8   | 37.5 | 4.1 |
| Peterborough    | 8.6                            | 19.2   | 30.3 | 3.1  | 0.8                           | 12.8   | 24.4 | 3.9 | 12.6                          | 25.1   | 36.2 | 3.8 |
| Simcoe          | 8.4                            | 19.2   | 28.1 | 3.3  | 2.8                           | 14.3   | 23.9 | 3.6 | 11.1                          | 23.6   | 34.0 | 3.9 |
| Stormont        |                                |        |      |      |                               |        |      |     |                               |        |      |     |
| Dundas and      |                                |        |      |      |                               |        |      |     |                               |        |      |     |
| Glengarry       | 9.2                            | 19.5   | 28.0 | 3.3  | 4.3                           | 13.9   | 22.8 | 3.9 | 11.1                          | 25.0   | 33.6 | 3.7 |
| Sudbury         | 4.4                            | 18.1   | 28.7 | 4.0  | -1.7                          | 11.4   | 22.3 | 4.1 | 5.5                           | 22.4   | 34.6 | 4.6 |
| Thunder Bay     | 5.2                            | 15.9   | 24.8 | 3.1  | 0.8                           | 10.8   | 19.5 | 3.3 | 8.2                           | 20.8   | 30.6 | 3.6 |
| Toronto         | 10.3                           | 20.5   | 30.2 | 3.2  | 5.7                           | 16.8   | 25.2 | 3.2 | 11.7                          | 24.2   | 36.7 | 3.8 |
| Waterloo        | 9.3                            | 19.6   | 30.0 | 3.5  | 1.9                           | 13.6   | 25.6 | 4.1 | 12.1                          | 25.0   | 35.5 | 4.1 |
| Wellington      | 5.3                            | 18.5   | 28.5 | 3.4  | 0.2                           | 12.9   | 23.8 | 3.9 | 9.4                           | 23.7   | 33.7 | 3.9 |
| York            | 9.3                            | 20.5   | 32.2 | 3.5  | 3.6                           | 15.0   | 27.2 | 3.6 | 13.3                          | 25.6   | 37.8 | 4.2 |

\* Standard deviation

**Supplemental Table S2.** Correlation between different metrics of temperature and air pollutants**A. Cold season**

|                     |                   | Ambient temperature |       |       | Windchill |       | Air pollution  |                 |                   |
|---------------------|-------------------|---------------------|-------|-------|-----------|-------|----------------|-----------------|-------------------|
|                     |                   | Mean                | Min.  | Max.  | Mean      | Max.  | O <sub>3</sub> | NO <sub>2</sub> | PM <sub>2.5</sub> |
| Ambient temperature | Mean              | 1                   | 0.96  | 0.96  | 0.94      | 0.85  | -0.43          | 0.14            | 0.29              |
|                     | Min.              | 0.96                | 1     | 0.87  | 0.92      | 0.79  | -0.41          | 0.11            | 0.25              |
|                     | Max.              | 0.96                | 0.87  | 1     | 0.87      | 0.86  | -0.41          | 0.16            | 0.30              |
| Windchill           | Mean              | 0.94                | 0.92  | 0.87  | 1         | 0.93  | -0.38          | 0.16            | 0.33              |
|                     | Max.              | 0.85                | 0.79  | 0.86  | 0.93      | 1     | -0.36          | 0.19            | 0.35              |
| Air pollution       | O <sub>3</sub>    | -0.43               | -0.41 | -0.41 | -0.38     | -0.36 | 1              | -0.71           | -0.58             |
|                     | NO <sub>2</sub>   | 0.14                | 0.11  | 0.16  | 0.16      | 0.19  | -0.71          | 1               | 0.63              |
|                     | PM <sub>2.5</sub> | 0.29                | 0.25  | 0.30  | 0.33      | 0.35  | -0.58          | 0.63            | 1                 |

**B. Warm season**

|                     |                   | Ambient temperature |      |      | Humidex |      | Air pollution  |                 |                   |
|---------------------|-------------------|---------------------|------|------|---------|------|----------------|-----------------|-------------------|
|                     |                   | Mean                | Min. | Max. | Mean    | Max. | O <sub>3</sub> | NO <sub>2</sub> | PM <sub>2.5</sub> |
| Ambient temperature | Mean              | 1                   | 0.85 | 0.91 | 0.96    | 0.93 | 0.52           | 0.21            | 0.65              |
|                     | Min.              | 0.85                | 1    | 0.61 | 0.89    | 0.76 | 0.42           | 0.20            | 0.57              |
|                     | Max.              | 0.91                | 0.61 | 1    | 0.83    | 0.92 | 0.51           | 0.19            | 0.61              |
| Humidex             | Mean              | 0.96                | 0.89 | 0.83 | 1       | 0.95 | 0.52           | 0.19            | 0.69              |
|                     | Max.              | 0.93                | 0.76 | 0.92 | 0.95    | 1    | 0.54           | 0.19            | 0.71              |
| Air pollution       | O <sub>3</sub>    | 0.52                | 0.42 | 0.51 | 0.52    | 0.54 | 1              | 0.01            | 0.64              |
|                     | NO <sub>2</sub>   | 0.21                | 0.20 | 0.19 | 0.19    | 0.19 | 0.01           | 1               | 0.4               |
|                     | PM <sub>2.5</sub> | 0.65                | 0.57 | 0.61 | 0.69    | 0.71 | 0.64           | 0.40            | 1                 |



**Supplemental Table S3.** ICD-9 and ICD-10 codes for study outcomes

| <b>Cause of death</b>                                 | <b>ICD-9 code</b> | <b>ICD-10 code</b> |
|-------------------------------------------------------|-------------------|--------------------|
| Non-accidental                                        | <800              | A00-R99            |
| Any cardiovascular                                    | 400-440           | I10-I70            |
| Ischemic heart                                        | 410-414           | I20-I25            |
| Acute myocardial infarction                           | 410               | I21                |
| Congestive heart failure, cardiac arrest, and related | 420-429           | I30-I51            |
| Cerebrovascular disease                               | 430-438           | I60-I69            |
| Diabetes                                              | 250               | E10-E14            |
| Any respiratory                                       | 460-519           | J00-J99            |

Confidential

**Supplemental Table S4.** Census divisions in five regions in Ontario

| <b>Region</b> | <b>Census Division</b>                                                                                                                                      |
|---------------|-------------------------------------------------------------------------------------------------------------------------------------------------------------|
| North         | Nipissing, Parry Sound, Sudbury, Greater Sudbury / Grand Sudbury, Timiskaming, Cochrane, Algoma, Thunder Bay, Rainy River, Kenora, Manitoulin               |
| West          | Perth, Oxford, Elgin, Chatham-Kent, Essex, Lambton, Middlesex, Huron, Bruce, Grey                                                                           |
| East          | Stormont Dundas and Glengarry, Prescott and Russell, Ottawa, Leeds and Grenville, Lanark, Frontenac, Lennox and Addington, Hastings, Prince Edward, Renfrew |
| Central East  | Toronto, Northumberland, Peterborough, Kawartha Lakes, Durham, York, Peel, Simcoe, Muskoka, Haliburton                                                      |
| Central West  | Dufferin, Wellington, Halton, Hamilton, Niagara, Haldimand-Norfolk, Brant, Waterloo                                                                         |

Confidential

**Supplemental Table S5.** Estimated percentage increase in daily non-accidental mortality for each 5°C increase in hot temperatures using the linear model and the corresponding estimates from the non-linear model for a 5°C change in temperature centered at the census division's 75<sup>th</sup> percentile of temperature in warm season, by the 10 largest census divisions in Ontario

| Model      | Excess Non-accidental Mortality in % (95% CI) |           |          |           |           |           |           |           |           |          |
|------------|-----------------------------------------------|-----------|----------|-----------|-----------|-----------|-----------|-----------|-----------|----------|
|            | Ottawa                                        | York      | Toronto  | Peel      | Hamilton  | Niagara   | Waterloo  | Essex     | Middlesex | Simcoe   |
| Linear     | 2 (-2-5)                                      | 5 (1-11)  | 3 (0-5)  | -1 (-6-3) | 4 (-1-9)  | 0 (-4-6)  | 7 (2-12)  | -2 (-9-5) | 7 (1-13)  | 4 (-1-9) |
| Non-linear | 2 (-7-9)                                      | 4 (-9-12) | 2 (-2-6) | -1 (-9-6) | 3 (-8-33) | -1 (-6-5) | 6 (-1-13) | -1 (-8-7) | 7 (-2-15) | 2 (-4-6) |

Confidential

## Figure Legends

**Supplemental Figure S1.** Map of 27 selected census divisions, by regions in Ontario

**Supplemental Figure S2.** Pooled mean percent changes in daily mortality, by cause of death, by lag, and season, across 27 selected census divisions in Ontario, 1996-2010 (cold season: daily mean temperature at lag 0-6; warm season: daily mean temperature at lag 0).

**Supplemental Figure S3 (A).** Mean percent changes in daily cardiovascular-related deaths, by season and census divisions in Ontario, 1996-2010 (cold season: daily mean temperature at lag 0-6; warm season: daily mean temperature at lag 0)

**Supplemental Figure S3 (B).** Mean percent changes in daily respiratory-related deaths, by season and census divisions in Ontario, 1996-2010 (cold season: daily mean temperature at lag 0-6; warm season: daily mean temperature at lag 0)

**Supplemental Figure S3 (C).** Mean percent changes in daily coronary heart disease-related deaths, by season and census divisions in Ontario, 1996-2010 (cold season: daily mean temperature at lag 0-6; warm season: daily mean temperature at lag 0)

**Supplemental Figure S3 (D).** Mean percent changes in daily acute myocardial infarction-related deaths, by season and census divisions in Ontario, 1996-2010 (cold season: daily mean temperature at lag 0-6; warm season: daily mean temperature at lag 0)

**Supplemental Figure S3 (E).** Mean percent changes in daily heart failure-related deaths, by season and census divisions in Ontario, 1996-2010 (cold season: daily mean temperature at lag 0-6; warm season: daily mean temperature at lag 0)

**Supplemental Figure S3 (F).** Mean percent changes in daily stroke-related deaths, by season and census divisions in Ontario, 1996-2010 (cold season: daily mean temperature at lag 0-6; warm season: daily mean temperature at lag 0)

1  
2  
3 **Supplemental Figure S3 (G).** Mean percent changes in daily diabetes-related deaths, by season  
4 and census divisions in Ontario, 1996-2010 (cold season: daily mean temperature at lag 0-6;  
5 warm season: daily mean temperature at lag 0)  
6  
7  
8  
9  
10  
11  
12  
13  
14  
15  
16  
17  
18  
19  
20  
21  
22  
23  
24  
25  
26  
27  
28  
29  
30  
31  
32  
33  
34  
35  
36  
37  
38  
39  
40  
41  
42  
43  
44  
45  
46  
47  
48  
49  
50  
51  
52  
53  
54  
55  
56  
57  
58  
59  
60

Confidential

1  
2  
3  
4  
5  
6  
7  
8  
9  
10  
11  
12  
13  
14  
15  
16  
17  
18  
19  
20  
21  
22  
23  
24  
25  
26  
27  
28  
29  
30  
31  
32  
33  
34  
35  
36  
37  
38  
39  
40  
41  
42  
43  
44  
45  
46  
47  
48  
49  
50  
51  
52  
53  
54  
55  
56  
57  
58  
59  
60

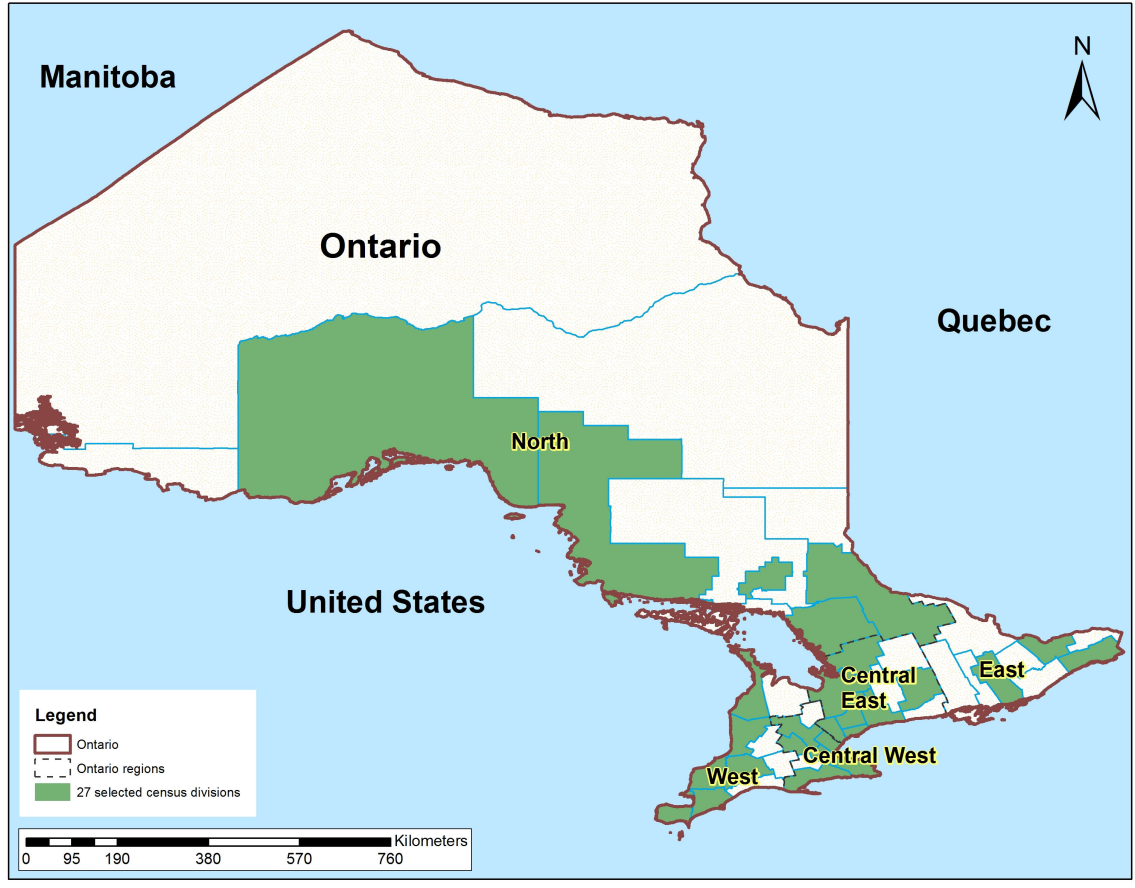

Figure S1. Map of 27 selected census divisions, by regions in Ontario

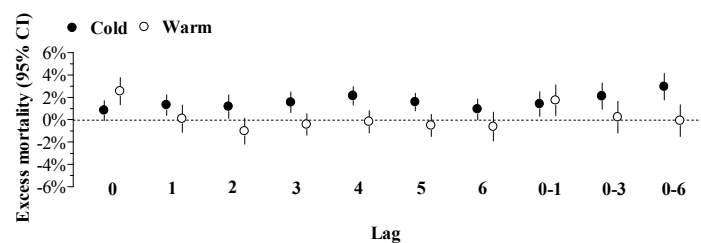

(A) Non-accidental death

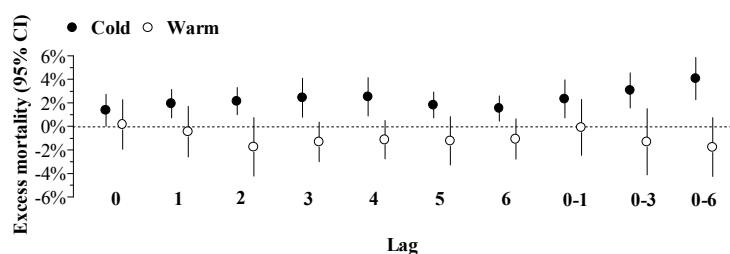

(B) Cardiovascular

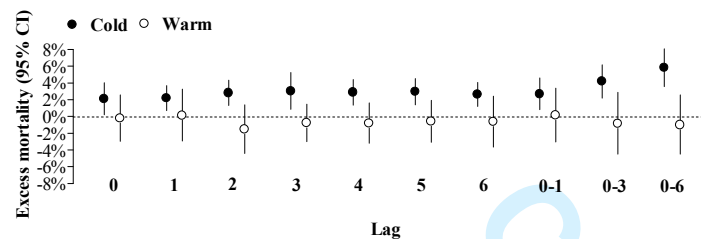

(C) Ischemic heart disease

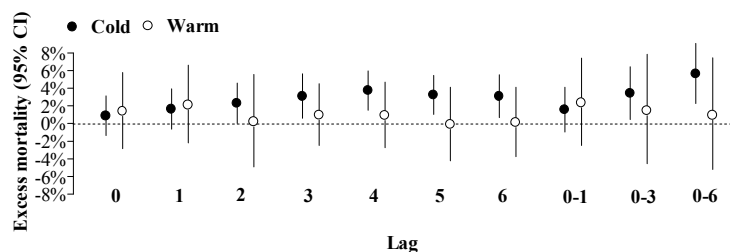

(D) Myocardial infarction

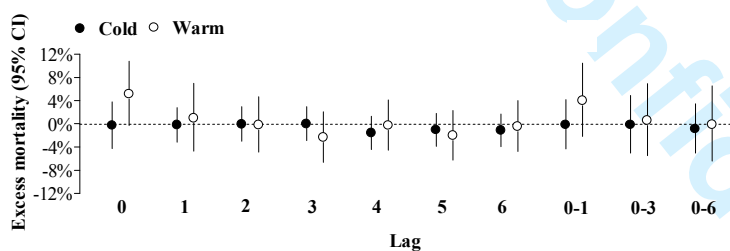

(E) Heart failure, cardiac arrest and related

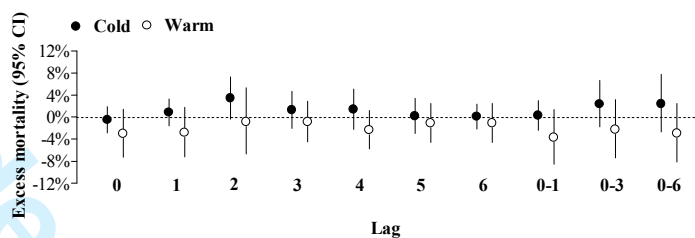

(F) Stroke

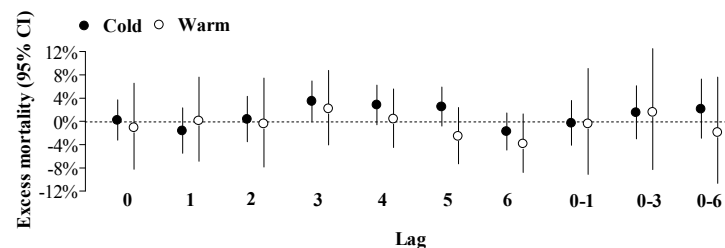

(G) Diabetes

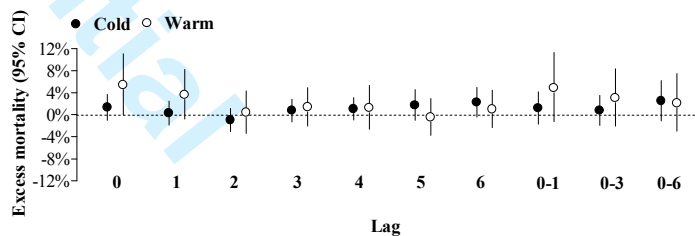

(H) Any respiratory illness

**Figure S2.** Pooled mean percent changes in daily mortality, by cause of death, by lag, and season, across 27 selected census divisions in Ontario, 1996-2010 (cold season: daily mean temperature at lag 0-6; warm season: daily mean temperature at lag 0).

1  
2  
3  
4  
5  
6  
7  
8  
9  
10  
11  
12  
13  
14  
15  
16  
17  
18  
19  
20  
21  
22  
23  
24  
25  
26  
27  
28  
29  
30  
31  
32  
33  
34  
35  
36  
37  
38  
39  
40  
41  
42  
43  
44  
45  
46  
47  
48  
49  
50  
51  
52  
53  
54  
55  
56  
57  
58  
59  
60

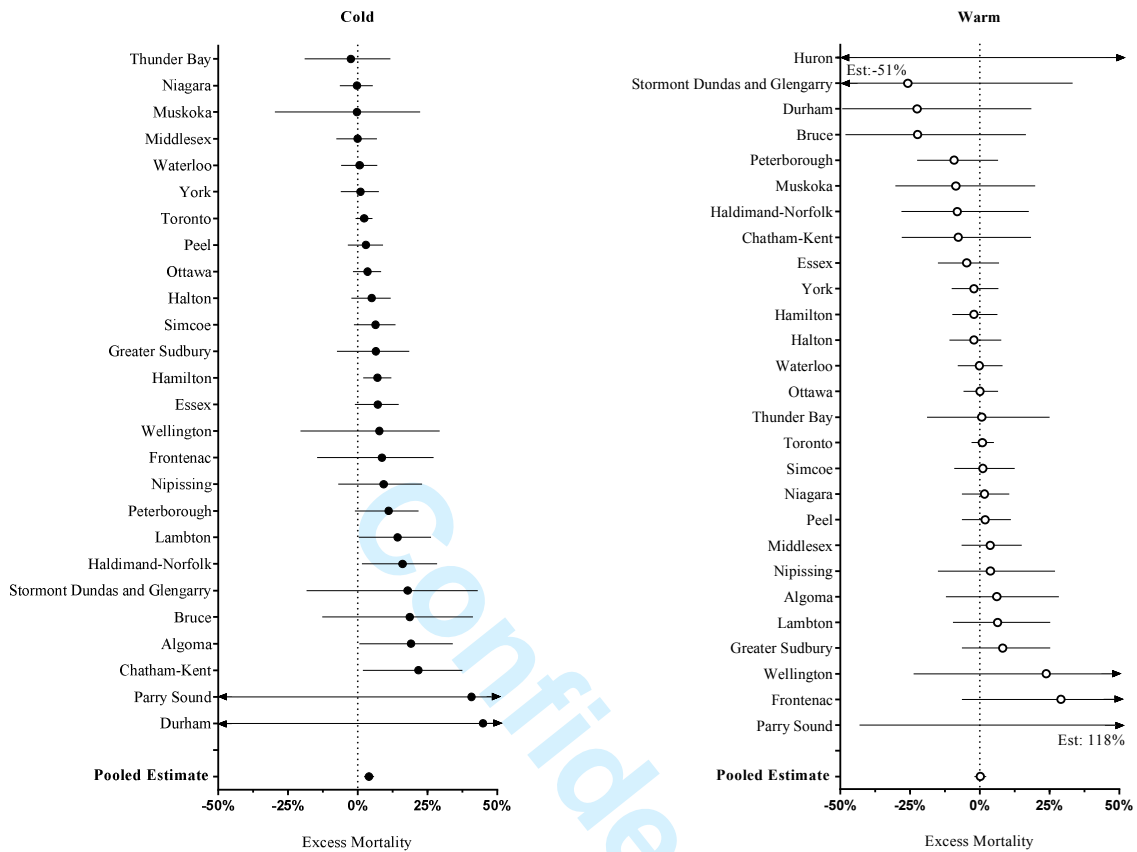

**Figure S3 (A).** Mean percent changes in daily cardiovascular-related deaths, by season and census division in Ontario, 1996-2010 (cold season: daily mean temperature at lag 0-6; warm season: daily mean temperature at lag 0)



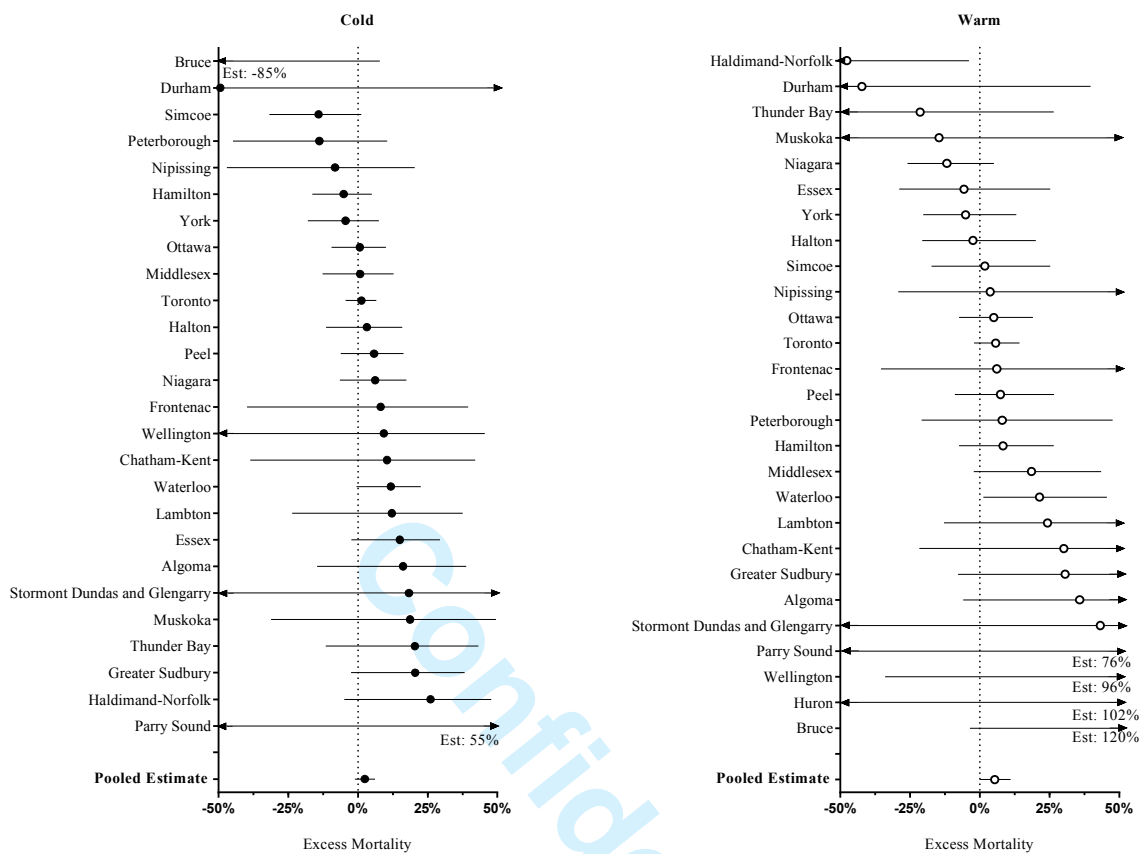

**Figure S3 (B).** Mean percent changes in daily respiratory-related deaths, by season and census division in Ontario, 1996-2010 (cold season: daily mean temperature at lag 0-6; warm season: daily mean temperature at lag 0)

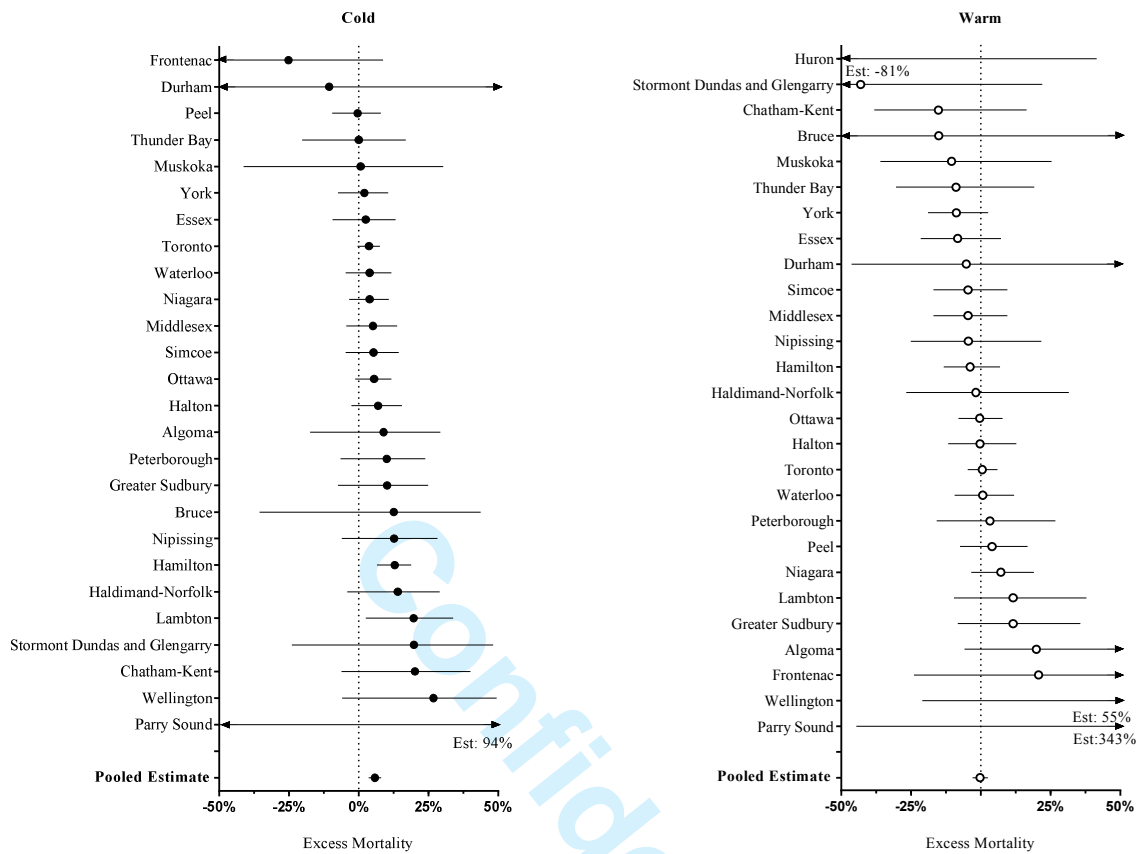

**Figure S3 (C).** Mean percent changes in daily coronary heart disease-related deaths, by season and census division in Ontario, 1996-2010 (cold season: daily mean temperature at lag 0-6; warm season: daily mean temperature at lag 0)

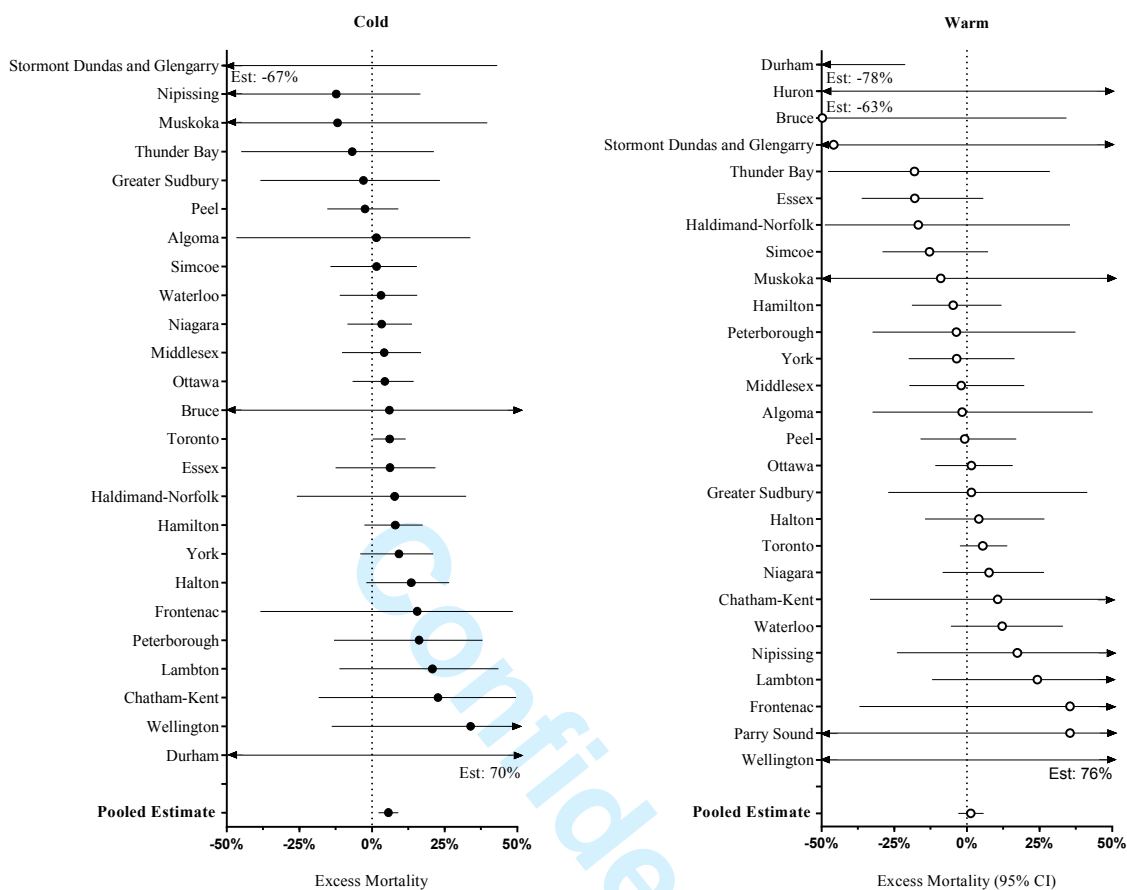

**Figure S3 (D).** Mean percent changes in daily acute myocardial infarction-related deaths, by season and census division in Ontario, 1996-2010 (cold season: daily mean temperature at lag 0-6; warm season: daily mean temperature at lag 0)

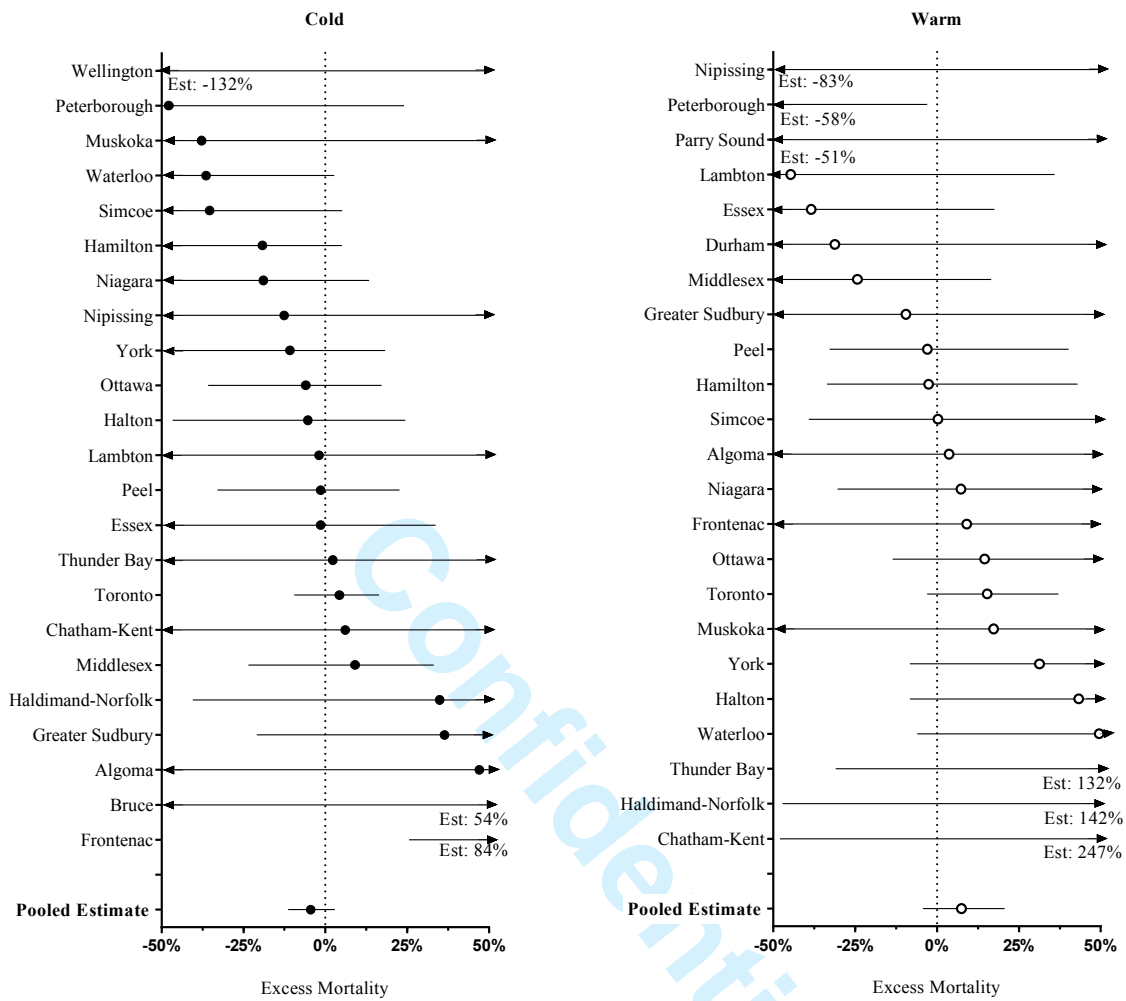

**Figure S3 (E).** Mean percent changes in daily heart failure-related deaths, by season and census division in Ontario, 1996-2010 (cold season: daily mean temperature at lag 0-6; warm season: daily mean temperature at lag 0)

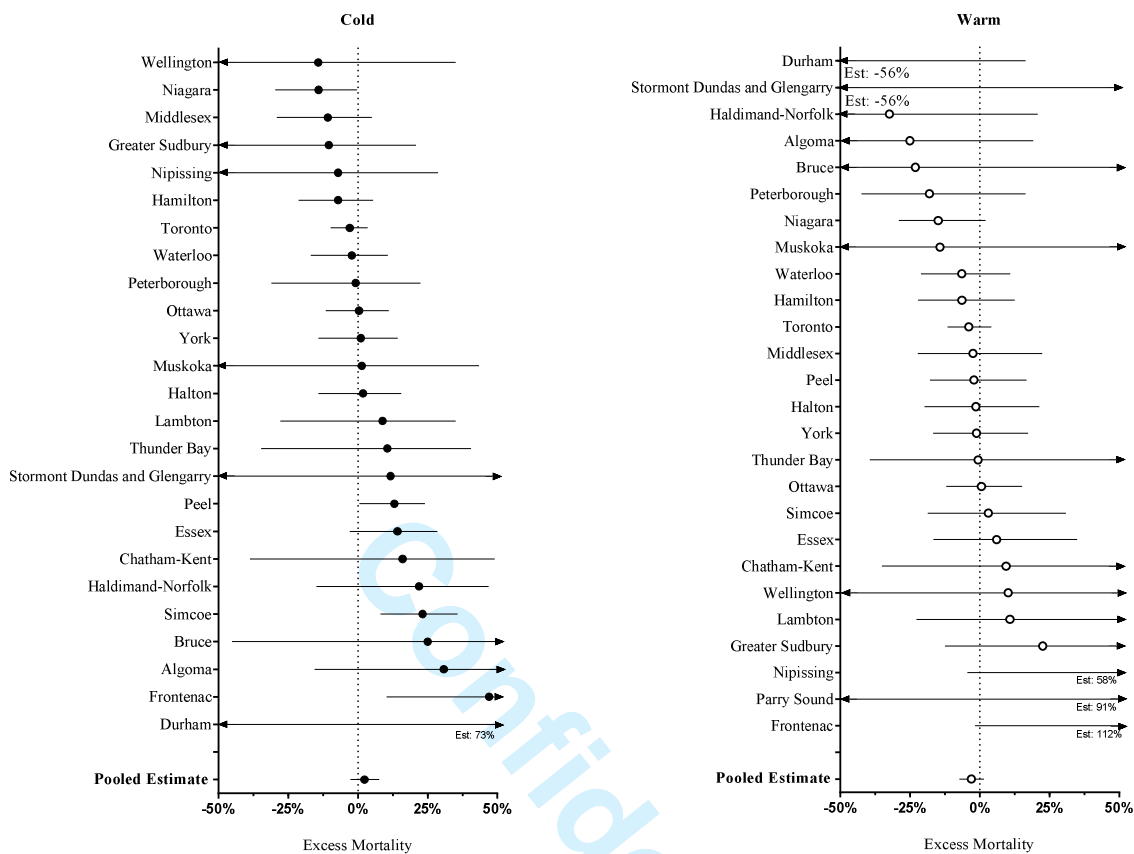

**Figure S3 (F).** Mean percent changes in daily stroke-related deaths, by season and census division in Ontario, 1996-2010 (cold season: daily mean temperature at lag 0-6; warm season: daily mean temperature at lag 0)

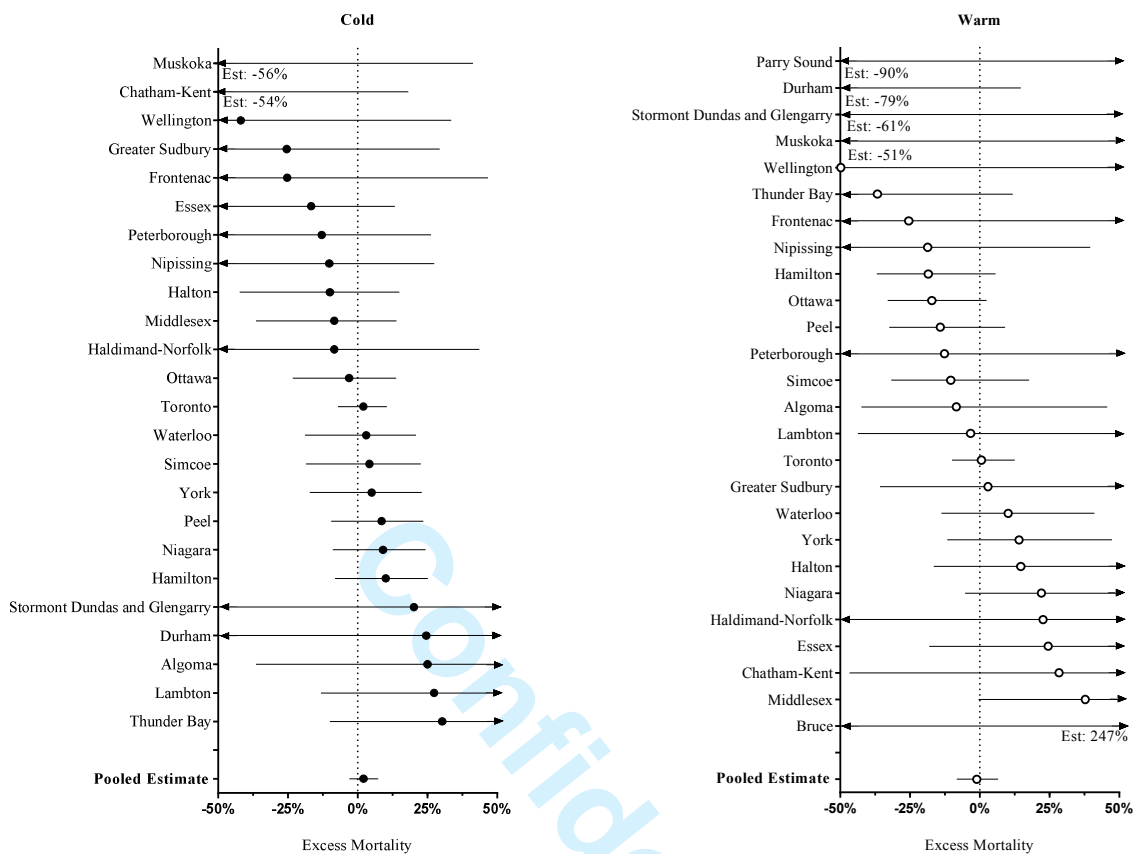

**Figure S3 (G).** Mean percent changes in daily diabetes-related deaths, by season and census division in Ontario, 1996-2010 (cold season: daily mean temperature at lag 0-6; warm season: daily mean temperature at lag 0)

## Reference

1. Chen H, Burnett RT, Kwong JC et al. Risk of Incident Diabetes in Relation to Long-term Exposure to Fine Particulate Matter in Ontario, Canada. *Environ Health Perspect* 2013;121:804-10.
2. Climate Services. Environment Canada. [http://climate.weather.gc.ca/data\\_index\\_e.html](http://climate.weather.gc.ca/data_index_e.html). [Accessed February 23, 2015].
3. Gasparrini A, Guo Y, Hashizume M et al. Mortality risk attributable to high and low ambient temperature: a multicountry observational study. *Lancet* 2015 DOI: [http://dx.doi.org/10.1016/S0140-6736\(14\)62114-0](http://dx.doi.org/10.1016/S0140-6736(14)62114-0)
4. SAS LGTPHCURV9 Macro. Boston, MA: Harvard School of Public Health. <http://www.hsph.harvard.edu/donna-spiegelman/software/igtphcurv9/> [Accessed June 30, 2015]
5. Gasparrini A, Armstrong B, Kenward MG. Distributed lag non-linear models. *Stat Med* 2010;29:2224-34.
6. Guo Y, Gasparrini A, Armstrong B et al. Global variation in the effects of ambient temperature on mortality: a systematic evaluation. *Epidemiology* 2014;25:781-9.
7. Goldberg MS, Gasparrini A, Armstrong B, Valois MF. The short-term influence of temperature on daily mortality in the temperate climate of Montreal, Canada. *Environ Res* 2011;111:853-60.
8. DerSimonian R, Laird N. Meta-analysis in clinical trials. *Control Clin Trials* 1986;7:177-88.
9. Anderson GB, Dominici F, Wang Y, et al. Heat-related emergency hospitalizations for respiratory diseases in the Medicare population. *Am J Respir Crit Care Med* 2013;187:1098-103.
10. Ostro B. Outdoor air pollution: Assessing the environmental burden of disease at national and local levels. Geneva, World Health Organization, 2004 (*WHO Environmental Burden of Disease Series, No. 5*).
